# Mechanical vibration patterns elicit behavioral transitions and habituation in crawling *Drosophila* larvae

Alexander Berne<sup>1</sup>, Tom Zhang<sup>1</sup>, Joseph Shomar<sup>1</sup>, Anggie J. Ferrer<sup>1</sup>, Aaron Valdes<sup>1</sup>, Tomoko Ohyama<sup>2</sup>, Mason Klein<sup>1\*</sup>

\*For correspondence:  
[klein@miami.edu](mailto:klein@miami.edu) (MK)

<sup>1</sup>Department of Physics, Department of Biology, University of Miami, Coral Gables, Florida USA; <sup>2</sup>Department of Biology, McGill University, Montreal, Quebec Canada

**Abstract** How animals respond to repeatedly applied stimuli, and how animals respond to mechanical stimuli in particular, are important questions in behavioral neuroscience. We study adaptation to repeated mechanical agitation using the *Drosophila* larva. Vertical vibration stimuli elicit a discrete set of responses in crawling larvae: continuation, pause, turn, and reversal. Through high-throughput larva tracking, we characterize how the likelihood of each response depends on vibration intensity and on the timing of repeated vibration pulses. By examining transitions between behavioral states at the population and individual levels, we investigate how the animals habituate to the stimulus patterns. We identify time constants associated with desensitization to prolonged vibration, with re-sensitization during removal of a stimulus, and additional layers of habituation that operate in the overall response. Known memory-deficient mutants exhibit distinct behavior profiles and habituation time constants. An analogous simple electrical circuit suggests possible neural and molecular processes behind adaptive behavior.

## Introduction

Animals operate in environments where complex external information is sensed, processed, and ultimately influences the likelihood of each possible behavior in their repertoire. They must distinguish relevant and irrelevant information to optimize their behavior to varied (and changing) environmental conditions (Zucker (1972); Geyer and Braff (1987); Jäger and Henn (1981); Rose and Rankin (2001); Sasaki et al. (2001)). As a result, many animals adapt to external inputs, and sometimes retain specific stimulus information (Duerr and Quinn (1982); Rose and Rankin (2001)). How information is translated into meaningful behavioral output is an important question in neuroscience research.

An animal that can dynamically respond to stimuli increases its chances of survival. A freely crawling insect larva in search of food, for example, can react to danger, an obstacle or other aversive stimulus by moving or changing direction. This has been observed in behavioral analysis of chemotaxis, phototaxis, thermotaxis, and mechanosensitive avoidance (Xiang et al. (2010); Zhang et al. (2013); Rosenzweig et al. (2008); Gershow et al. (2012); Kane et al. (2013); Klein et al. (2015); van Giesen et al. (2016); Ohyama et al. (2013)). Consistent exposure to a stimulus can evoke habituation, where avoidance is diminished in favor of more exploratory behaviors. More complex animals show similar characteristics: the habituation of fly larvae exposed to non-threatening aversive odors

40 (*Eddison et al. (2012)*) or *C. elegans* and *Aplysia* exposed to mechanical stimuli (*Rose and Rankin*  
41 *(2001)*; *Stopfer and Carew (1996)*; *Rosen et al. (1979)*) is seen also in mice (*Crawley (1985)*; *Belzung*  
42 *and Griebel (2001)*). In these examples, switching between avoidance and exploratory behaviors  
43 relies on the animal's stimulus history, so they must retain some information about that history.

44 The *Drosophila* larva serves as a good organism for investigating short-term retention and  
45 loss of information and how these phenomena affect behavior. The animal has a limited array  
46 of simple, discrete behaviors (crawling, turning, stopping, reversing, hunching, rolling, burrowing,  
47 etc.); it moves slowly, enabling precise observation of its body movements; many relevant neurons  
48 have been identified and characterized, and the animal is optically transparent, enabling *in vivo*  
49 neurophysiology; and the fruit fly has many genetic tools readily available. Studies have also  
50 noted that *Drosophila* larvae can retain olfactory stimulus information for extended periods of  
51 time (*Gerber and Stocker (2007)*; *Dubnau et al. (2001)*; *Brea et al. (2014)*; *Quinn et al. (1974)*). Tests  
52 identifying associative olfactory learning and memory have shown that larvae maintain conditioning  
53 up to 24 hours after training, with a sharp initial decay followed by a more gradual decay in memory  
54 over time (*Tully and Quinn (1985)*). Although short-term (10 – 20 min) olfactory habituation has  
55 been observed (*Larkin et al. (2010)*), fewer studies have sought to quantitatively characterize the  
56 habituation of *Drosophila* larvae to other types of stimuli, and precise and rapid odor delivery can  
57 be complicated (*Su et al. (2011)*).

58 Mechanical agitation serves as a good aversive stimulus to study short-term behavior. Because  
59 the intensity and timing of vibration can be controlled (*Ohyama et al. (2013)*) and can evoke context-  
60 dependent responses (*Zhang et al. (2013)*; *Kim et al. (2012)*), we choose here to use vibration to  
61 investigate short-term behaviors associated with information retention. Both high-force touching  
62 (*Zhang et al. (2016)*) and lower-force controlled vibration (*Ohyama et al. (2015)*) can be precisely  
63 controlled and delivered, and can be rapidly initiated and terminated (*Ohyama et al. (2013)*).  
64 *Drosophila* exhibit avoidance responses to both types of mechanical stimuli (*Zhang et al. (2013)*;  
65 *Fowler and Montell (2013)*; *Kim et al. (2012)*). Rolling is a stereotyped response to noxious stimuli  
66 like high-force touching (*Hoyer et al. (2018)*; *Almeida-Carvalho et al. (2017)*; *Zhong et al. (2010)*).  
67 Weaker forms of mechanical agitation (vibration, low-force touching) lead to milder responses like  
68 reversing and turning (*Zhang et al. (2013)*; *Kim et al. (2012)*; *Hwang et al. (2007)*), the primary focus  
69 of this paper.

70 Vibration elicits a discrete set of observable behaviors and associated neural interactions in  
71 crawling larvae. Avoidance behaviors in response to non-nociceptive vibrations, during and after  
72 stimulus delivery, are typically constructed of distinct sequences: a halting of forward motion (stop),  
73 then either a continuation of the crawl (pause), a change in forward direction (turn), or backwards  
74 motion (reversal) (*Zhang et al. (2013)*; *Kim et al. (2012)*; *Xiang et al. (2010)*; *Pulver et al. (2011)*).  
75 These sequences are initialized by the activation of dendritic arborization neurons and chordotonal  
76 neuronal complexes lining the upper and lower portions of each larva segment (*Grueber et al.*  
77 *(2007)*; *Cheng et al. (2010)*; *Ohyama et al. (2013)*). The mechanosensory transformation ends  
78 by relaying information from second order neurons in the ventral nerve cord (VNC) to motor  
79 neurons, causing muscle contractions (*Karkali and Martin-Blanco (2017)*; *Grueber et al. (2007,*  
80 *2002)*; *Ohyama et al. (2013)*; *Fushiki et al. (2016)*). Full circuit- and molecular-level descriptions of  
81 mechanical response remain elusive (*Tuthill and Wilson (2016)*).

82 The stereotyped stop and reversal behaviors in larvae differ in spontaneity, excitability, and  
83 function. Stopping behavior occurs spontaneously in the absence of a stimulus, and with increased  
84 (decreased) frequency in the presence of aversive (attractive) stimuli (*Xiang et al. (2010)*; *Titlow*  
85 *et al. (2014)*; *Pulver et al. (2011)*; *Riedl and Louis (2012)*). The probability of stopping after stimulus  
86 delivery depends on the larva's stage of neuronal development, the stimulus intensity, and the  
87 stimulus history. There is also a strong component of apparent randomness. Unlike pauses or  
88 turns, reversals rarely occur spontaneously and generally require an intense aversive stimulus  
89 (*Gjorgjieva et al. (2013)*; *Eddison et al. (2012)*; *Berni et al. (2012)*), and thus are typically considered  
90 to be stronger avoidance than a pause or turn. Although optogenetic experiments have mapped

91 components of the neural circuit for backward locomotion (*Clark et al. (2018)*), the exact mechanism  
92 responsible for the reverse crawl motion remains unclear in *Drosophila* larvae (*Tuthill and Wilson*  
93 *(2016)*). On the molecular side, the regulatory protein calmodulin (CaM) functions in a larva's  
94 regulation of reversals, and spontaneous reversals occur more frequently in CaM null mutants  
95 (*Karkali and Martin-Blanco (2017)*; *Heiman et al. (1996)*).

96 In this paper we quantitatively describe the behavioral response of *Drosophila* larvae to repeated  
97 mechanical stimulation, characterizing the onset of habituation and how habituation fades over  
98 time. First we measure the probabilities that larvae perform each type of avoidance behavior in  
99 response to a range of vibration intensities, a characterization of sensitivity to a multi-dimensional  
100 stimulus. We investigate how *individual* larvae transition from performing one behavior to another  
101 between stimulus pulses, and find an almost completely one-way trend away from the strongest  
102 avoidance behaviors. Second we characterize the onset of habituation in response to vibration  
103 pulses, and extract time constants to describe both de-sensitization and a more complex re-  
104 sensitization process. Third, we characterize the response and habituation processes in known  
105 memory-deficient mutants. Finally, we use an electric circuit analogy to suggest how our behavioral  
106 results have implications for neural mechanisms behind short-term stimulus information retention  
107 and processing.

## 108 Results

### 109 Vibration response maps in 2D stimulus space

110 We designed and constructed a device to deliver a precisely timed sequence of pulses of mechanical  
111 vibration of specific frequency and force. An electromechanical transducer (EMT) provides sinusoidal  
112 vertical vibration, and a CCD camera records the shapes and trajectories of multiple larvae crawling  
113 on an agar gel atop the EMT's customized platform (Fig. 1A). The instrument delivers mechanical  
114 vibration to the animals, and we describe the stimulus using two timing parameters and two  
115 intensity parameters. The time  $T_{ON}$  is the duration of each vibration application, and  $T_{OFF}$  is the  
116 time between the end of one vibration pulse and the start of the next. The period of the cycle we  
117 denote  $T = T_{ON} + T_{OFF}$ . The vertical displacement of every larva during vibration is  $z(t) = A \sin 2\pi ft$ ,  
118 where  $f$  is the frequency and  $A$  the amplitude (maximum displacement). Taking a cue from  
119 engineering and materials science applications of vibration testing (*Burtally et al. (2002)*; *Klein*  
120 *et al. (2006)*), we describe intensity with both  $f$  and the dimensionless peak acceleration  $\Gamma \equiv A\omega^2/g$ ,  
121 where  $\omega = 2\pi f$ , and  $g$  is the acceleration of gravity. A schematic of a typical stimulus is shown in  
122 Fig. 1B, where time  $t = 0$  marks the onset of the first in a series of vibrations, each counted with an  
123 index  $n$  (the initial pulse labeled as  $n = 0$ ). We use  $f$  and  $\Gamma$  as our parameters because materials or  
124 instruments are impacted both by the rate of vibration (especially near resonance frequencies) and  
125 by the amount of force delivered ( $\Gamma$  is the peak acceleration, proportional to the force, scaled in  
126 units of  $g$ ). We expect the same holds for biological systems. Together the four parameters ( $f$ ,  $\Gamma$ ,  
127  $T_{ON}$ ,  $T_{OFF}$ ) fully describe the stimulus for any experiment we perform in this paper.

128 We sought to characterize how the strength of avoidance response in crawling larvae depends  
129 on the strength of the applied vibration stimulus. In the 2D free-crawling assay employed here,  
130 we classify larva behavioral response with four possible actions, in ascending order of avoidance  
131 strength: (1) continuing; (2) pausing; (3) turning; and (4) reverse crawling (Fig. 1C,D). The first three  
132 behaviors occur frequently even in the absence of an aversive stimulus, whereas reversals rarely  
133 do (*Gjorgjieva et al. (2013)*). Thus we refer to continuation as "non"-avoidance, pauses and turns  
134 as "weak" avoidance, and reversals as "strong" avoidance behavior. Following previous work (*Luo*  
135 *et al. (2010)*; *Lahiri et al. (2011)*), we treat 2D larval trajectories as alternating sequences of *runs* and  
136 *reorientations*: runs are bouts of forward crawling; reorientations occur when travel speed drops  
137 near zero, asymmetric muscle contractions in segments near the head point the animal in a new  
138 direction, and forward motion resumes. For the present classification system, we flag a "stop" when  
139 the larva drops significantly in speed, and from there: "pause" if forward motion resumes with a

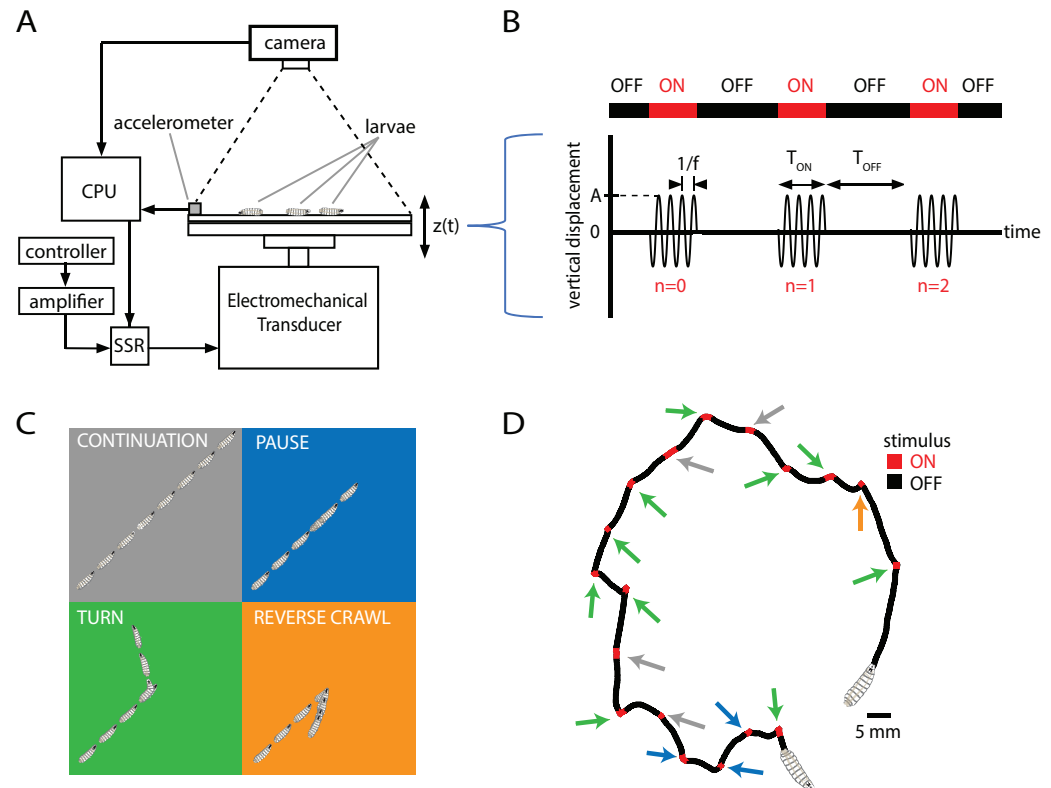

**Figure 1.** Vibration stimulus delivery and avoidance behavior classification. (A) Schematic of the experimental setup, where larvae crawl on a vertically vibrated agar gel supported by aluminum and steel plates. An electromechanical transducer provides vibration, while a CCD camera records 2D crawling of  $\approx 20$  red-light-illuminated animals simultaneously. See Methods and Materials for details. (B) Stimulus pattern in a typical experiment. Beginning at time  $t = 0$ , pulses of sinusoidal vibration are delivered for a duration of  $T_{ON}$ , and repeated at times  $t = n(T_{OFF} + T_{ON}) = nT$ , where  $n$  is an integer referring to  $n^{th}$  application of the stimulus. The initial vibration is referred to as the  $n = 0$  stimulus, the next as  $n = 1$ , etc. Vibration strength is described by the frequency  $f$  and the peak (dimensionless) acceleration  $\Gamma$ . In the top horizontal bar, red indicates stimulus ON, and black indicates stimulus OFF. (C) Schematic of four behavioral responses to non-nociceptive vibration: continuation (gray), pause (blue), turn (green), and reverse (orange). In each illustration the larva crawls forward from the bottom left, and a stimulus is delivered in the center. Pictures in the sequence are equally spaced in time. (D) Representative trajectory of a single larva crawling for 300 s during a vibration experiment ( $f = 500$  Hz,  $\Gamma = 2$ ,  $T_{ON} = 10$  s,  $T_{OFF} = 20$  s). The four behaviors are indicated by arrows matching the behavior's color from (C).

140 change in orientation of  $\Delta\theta < 30^\circ$ , “turn” if  $\Delta\theta > 30^\circ$ , and “reverse” if the head-pointing direction and  
141 overall velocity are in opposing directions.

142 In general  $F_{n, ACTION}$  refers to the fraction of larvae performing “ACTION” in response to the  $n^{th}$   
143 application of the stimulus. Response to the initial ( $n = 0$ ) stimulus would be described by:

$$\begin{aligned} F_{0, CONT} &= \frac{N_{CONT}}{N}, \\ F_{0, PAUSE} &= \frac{N_{PAUSE}}{N}, \\ F_{0, TURN} &= \frac{N_{TURN}}{N}, \\ F_{0, REV} &= \frac{N_{REV}}{N}, \end{aligned} \tag{1}$$

144 where  $N_{CONT}$ ,  $N_{PAUSE}$ ,  $N_{TURN}$ , and  $N_{REV}$  are the number of larvae that perform a continuation,  
145 pause, turn, or reversal, respectively, and  $N$  is the total number of active larvae. We also use  
146  $F_{STOP}$ , the fraction of larvae that performed any kind of avoidance behavior; by definition,  $F_{STOP} \equiv$   
147  $F_{PAUSE} + F_{TURN} + F_{REV}$ . Also by definition,  $F_{CONT} + F_{PAUSE} + F_{TURN} + F_{REV} = 1$ .

148 These fractional behavioral responses are mapped to vibration conditions in  $f - \Gamma$  space in  
149 Fig. 2. In agreement with other studies indicating that reverse crawling is specifically a reaction  
150 to aversive stimuli (Kernan *et al.* (1994); Hughes and Thomas (2007)), our control data ( $\Gamma = 0$ , no  
151 vibration) shows a very small number of reversals in the  $t = 0 - 2$  s time window ( $F_{0, REV} = 0.03$ ),  
152 while larvae perform pause and turn behaviors at a baseline level with no stimulus ( $F_{0, STOP} = 0.24$ ).  
153 During repeated vibrations for a given  $\Gamma$ ,  $f$  condition, we observed habituation: a steady decrease  
154 over time in the fraction of larvae performing the stronger avoidant reverse crawl behavior ( $F_{REV}$ ),  
155 and in the fraction exhibiting any avoidance behavior ( $F_{STOP}$ ), both during and between stimuli  
156 (individual plots in Fig. 2). This suggests that larvae habituate to the presence of vibration, and that  
157 habituation does not immediately “clear” when the stimulus turns off.

158 To more comprehensively understand overall habituation to vibration stimulation, we char-  
159 acterized how, within a population, the fraction of animals deploying each possible behavior  
160 ( $F_{CONT}, F_{PAUSE}, F_{TURN}, F_{REV}$ ) shifts during repeated exposure to the stimulus. The fractional usage of  
161 all four behaviors over a longer time scale is shown in Fig. 2C. In that example ( $\Gamma = 2$ ,  $f = 500$  Hz),  
162 reversal fraction  $F_{REV}$  diminishes in favor of turn fraction  $F_{TURN}$ . To see how this fits within the  
163 larger vibration intensity parameter space, we constructed a compound graph showing fractional  
164 avoidance behavior usage during repeated vibration pulses, for 29 distinct combinations of  $f$  and  $\Gamma$   
165 (Fig. 2D). While the shift away from  $F_{REV}$  appears to hold throughout  $f - \Gamma$  space, many vibration  
166 settings do not cause appreciable reversal behavior at all, particularly for very low frequencies or  
167 accelerations. As a general trend, increasing vibration strength by adjusting either frequency or  
168 peak acceleration increases the fraction of both stopping and reversing larvae. We note that the  
169 relationship is not linear, but instead increasing  $f$  or  $\Gamma$  yields a sharper transition of behavior within  
170 the range of these two parameters explored here, where a threshold in vibration space separates  
171 reversing and non-reversing behavioral response.

## 172 **Habituation is an essentially one-way process in individual larvae**

173 In addition to a population-level treatment of habituation, we investigated the behavior of indi-  
174 viduals during exposure to repeated vibration stimuli. Using recorded trajectories (positions and  
175 body contours over time) of many individual crawling larvae, we extracted behavioral sequences  
176 and noted how each animal responded to each vibration in a sequence of pulses (Fig. 3A). Each  
177 response was determined by a larva’s locomotion during the first 3 s after each vibration pulse was  
178 turned on. Every transition (*e.g.*,  $REV \rightarrow PAUSE$ ) or repeat (*e.g.*,  $PAUSE \rightarrow PAUSE$ ) was counted  
179 and compiled to form Fig. 3B, C, which effectively gives the probability for an individual to switch  
180 from behavior  $X$  in response to one pulse to behavior  $Y$  in response to either the next pulse (B) or  
181 the fifth pulse after (C).

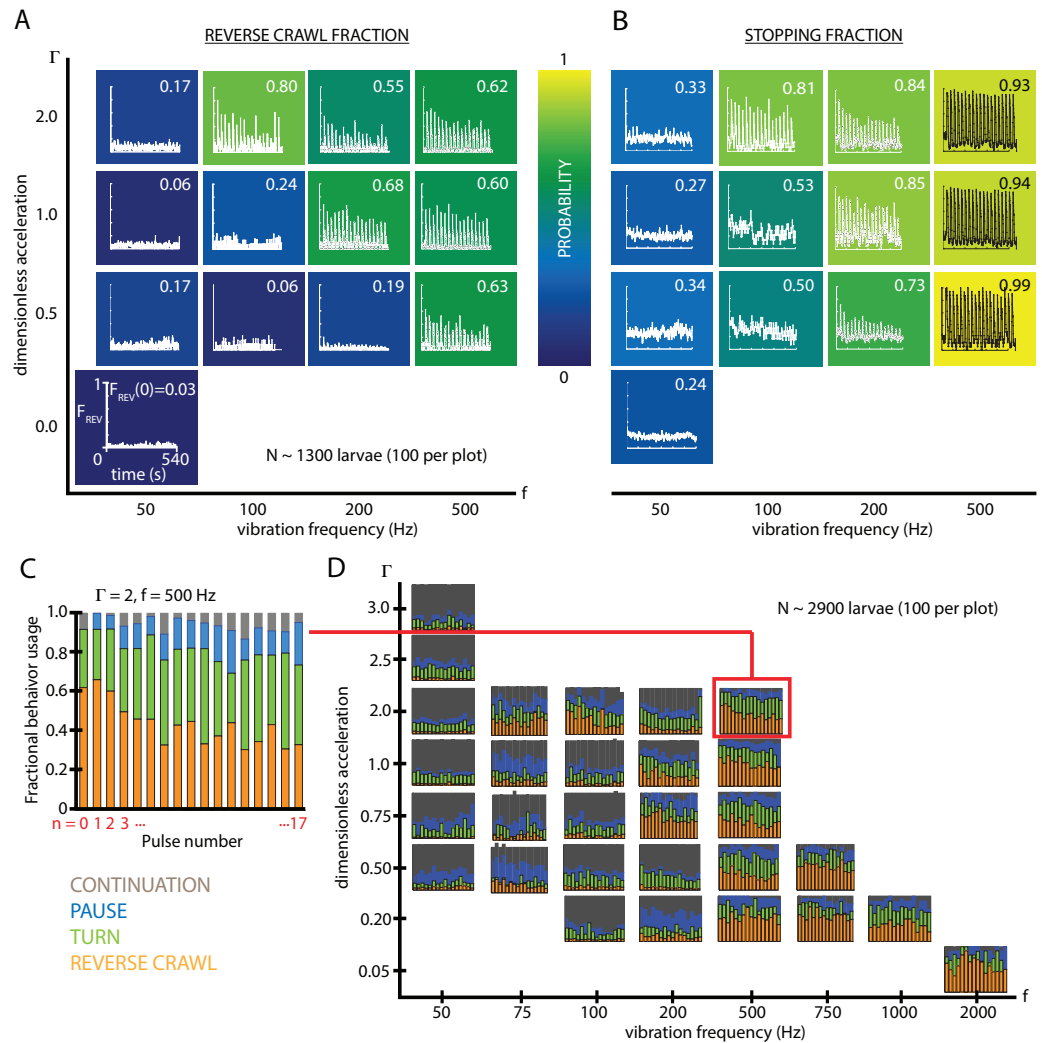

**Figure 2.** Fractional strong and weak behavioral responses depend on vibration strength. (A) Reversal behavior heat map. Vibration parameters were  $T_{ON} = 10$  s,  $T_{OFF} = 20$  s, with  $\Gamma$  ranging from 0 – 2 and frequency between 50 and 500 Hz.  $F_{0,REV}$ , the fraction of larvae that reverse crawl after the first ( $n = 0$ ) vibration pulse is printed for each  $f - \Gamma$  square region, alongside graphs of  $F_{REV}(t)$ , averaged over all experiments. Color indicates the  $F_{0,REV}$  value. All graphs have the same scale in  $F$  and  $t$ . Each  $(f, \Gamma)$  result is based on 5 experiments, each with  $\approx 20$  larvae (total 1300 animals), and lasting 600 s. Note that the  $f$  and  $\Gamma$  axes are not on a linear scale. Uncertainties in  $F_{0,REV}$  are not listed, but are  $< 0.001$  for all values. (B) Stopping behavior heat map. From the same experiments as (A), but considering  $F_{STOP}$ , the fraction of larvae showing any avoidance behavior (pause, turn, or reversal). As vibration strength increases (along either the  $f$  or  $\Gamma$  axes), the fraction of avoidant larvae increases. (C) Fractional deployment of the behavioral repertoire during habituation.  $F_{REV}$  (orange),  $F_{TURN}$  (green),  $F_{PAUSE}$  (blue), and  $F_{CONT}$  (gray) during a 3-second window after pulse initiation, as a function of the pulse number  $n$ . Over time the stronger avoidance behavior diminishes in favor of weaker avoidance and non-avoidance.  $\Gamma = 2$ ,  $f = 500$  Hz. (D) Behavioral repertoire over a range of vibration space. Fractional use of behaviors as a function of vibration pulse number ( $n$ ) for repeated vibrations ( $T_{ON} = 10$  s,  $T_{OFF} = 30$  s), for many specific  $f, \Gamma$  combinations. Each experimental condition is represented by a  $F$  vs.  $n$  plot, and the response of 100 larvae is averaged, for a total of 2900 animals.

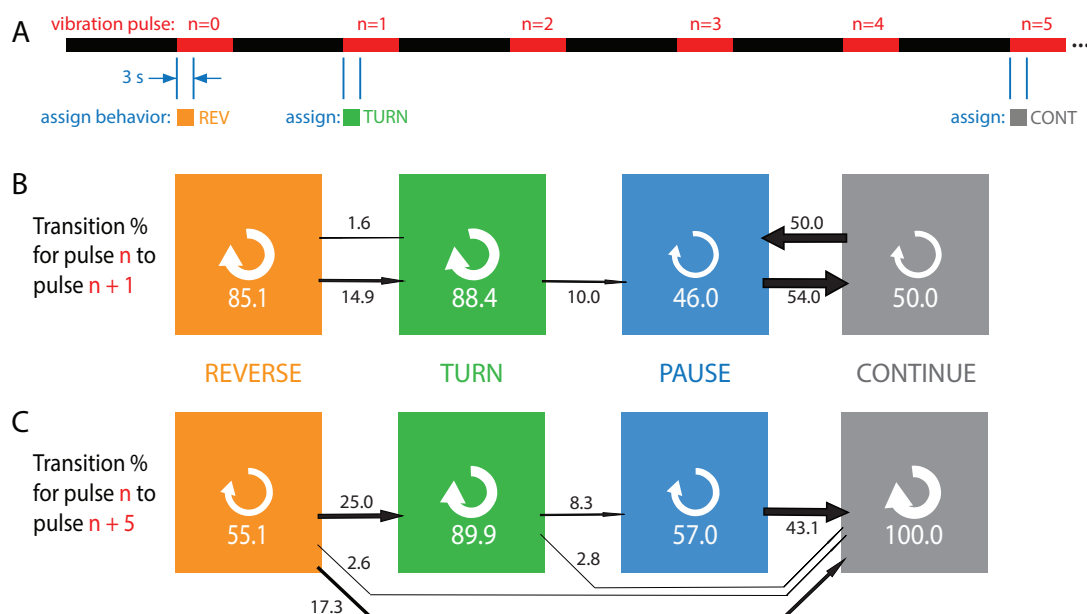

**Figure 3.** Habituation to repeated pulses is an essentially one-way process for individuals. (A) Schematic of the stimulus pattern and example analysis. The stimulus consisted of vibration ( $f = 500$  Hz,  $\Gamma = 2$ ) with repeated pulses of width  $T_{ON} = 10$  s, repeated after  $T_{OFF} = 20$  s. The behavior of each individual, in the 3 s following the onset of each vibration pulse, was assigned to one of four categories: reverse crawl (orange), turn (green), pause (blue), or continuation (gray). In the example shown, a larva reverse crawls in response to the  $n = 0$  pulse, then turns in response to the next, and continues in response to the  $n = 5$  pulse. (B, C) Behavioral transitions during repeated stimuli for individual larvae. For a given behavior observed in response to pulse  $n$ , the arrows represent the percentage of larvae that exhibit each of the four behaviors in response to pulse  $n + 1$  (B) or  $n + 5$  (C). White circular arrows represent repeating the same behavior, and the thickness of the black arrows is proportional to the fraction of animals that make the respective transition. The sum of the repeat arrows and all outgoing arrows is 100 for each behavior. Larvae were observed in 5 separate experiments, for a total of 107 animals making  $\approx 1800$  behavioral transitions.

182 Stronger avoidance behaviors tend to switch to weaker avoidance behaviors, consistent with  
 183 the population results. Of particular note is that an individual animal almost never returns to the  
 184 stronger (reverse crawl) behavior after responding with a weaker one. Specifically, when comparing  
 185 an assigned behavior to the behavior five pulses later, we found zero instances of transitions to  
 186 reverse crawling, and zero instances of transitioning out of the continuation non-response. Thus  
 187 habituation appears to be a one-way process, at both population and individual levels, indicated  
 188 by the general flow of the arrows to the right in Fig. 3, with the effect becoming more dramatic as  
 189 more time elapses.

### 190 Rapid habituation during continuous and pulsed vibration

191 In an attempt to more precisely understand the larva's complex behavioral response to vibrations,  
 192 we turned to a signal processing method that generates a mathematical function that could  
 193 predict the animal's response to any mechanical stimulus. If a system is approximately linear and  
 194 time-invariant (LTI), a common technique (*Koopmans (1995)*) is to determine the system's impulse  
 195 response function (IRF). In principle this means applying a stimulus ( $S$ ) in the form of a delta  
 196 function,  $S(t) = \delta(t)$ , and measuring the system's response  $h(t)$ . That specific response function then  
 197 becomes a predictive filter of behavior, such that the general response  $R(t)$  to any stimulus  $S(t)$   
 198 would be

$$R(t) = S(t) * h(t) = \int_{-\infty}^{+\infty} S(\tau)h(t - \tau)d\tau \quad (2)$$

199 We limited our scope to a single vibration intensity ( $f = 500$  Hz,  $\Gamma = 2$ ), and approximated a  
 200 delta function impulse with a short sinusoidal vibration burst lasting  $T_{ON} = 1$  s, with a long time

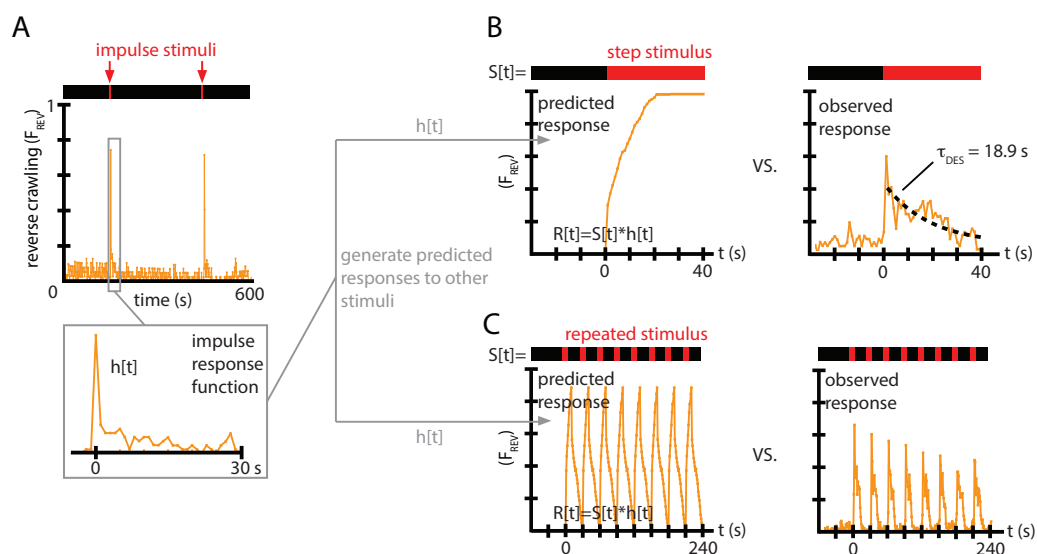

**Figure 4.** Impulse response experiments show that avoidance response to vibration is nonlinear and adaptive. (A) The fraction of larvae performing reverse crawling ( $F_{REV}(t)$ ) while exposed to very short bursts of strong vertical vibration ( $f = 500$  Hz,  $\Gamma = 2$ ,  $T_{ON} = 1$  s,  $T = 300$  s). Inset shows a time-expanded view of the response, labeled as  $h[t]$  to denote the impulse response function (IRF) used to make predictions for other stimulus inputs. (B) Avoidant response ( $F_{REV}$ ) to continuous vibration, as predicted by a linear, time-invariant (LTI) model using the impulse responses  $h[t]$  from (A) (left), and as observed empirically (right). (i.e.,  $T_{OFF} = 0$ ) with  $f = 500$  Hz and  $\Gamma = 2$ . (C) Avoidant response ( $F_{REV}$ ) to repeated pulse vibration ( $f = 500$  Hz,  $\Gamma = 2$ ,  $T_{ON} = 10$  s,  $T_{OFF} = 20$  s), as predicted by a linear, time-invariant (LTI) model using the impulse responses  $h[t]$  from (A) (left), and as observed empirically (right). The LTI calculation fails to predict the empirical behavior due to de-sensitization (B) and slow re-sensitization (C). Each plot is the average from 5 experiments using 20 larvae each (total 100 animals).

201 between bursts ( $T = 300$  s). The resulting fractional behavioral response  $F_{REV}(t)$  (Fig. 4A) shows an  
 202 abrupt spike in reverse crawl behavior immediately after the vibration impulses ( $t = 0$  and  $t = 300$  s),  
 203 followed by a slower return to baseline that takes approximately 15 – 20 s. We note that this impulse  
 204 response form, in a sense the “decay” of the avoidance behavior upon removal of the stimulus, is  
 205 similar to the decay of olfactory conditioning memory (Tully and Quinn (1985)), although on a much  
 206 shorter time scale.

207 We used this impulse response to generate predictions of the reversal behavior  $F_{REV}$  under two  
 208 other, distinctly different vibration pulse conditions. With the same  $f$  and  $\Gamma$  used to determine  
 209 the IRF, we first measured response to a continuous vibration stimulus starting at  $t = 0$ , and then  
 210 measured response to repeated pulses ( $T_{ON} = 10$  s,  $T_{OFF} = 20$  s). For both comparisons, we used the  
 211  $F_{REV}(t)$  function from Fig. 4A as  $h(t)$ . We then computed the discretized version of the convolution  
 212 from Eq. 2,  $R[t] = \sum S[\tau]h[t - \tau]$ , with time steps of 1 s, to generate predicted responses to the  
 213 continuous vibration or to the repeated pulses,  $F_{REV}(t)$ .

214 Comparing these predictions to the empirically observed behavior (Fig. 4B,C), we find that the  
 215 LTI predictions fail in two important ways. First, in response to a continuous stimulus, larvae do  
 216 not maintain their stopping or reversal rates, but instead return to baseline after  $\approx 20$  s. Second, in  
 217 response to the repeated pulses, not only does the avoidance behavior not continue during the  
 218 entirety of the 10 s bursts, but the response at the beginning of each burst diminishes over time.  
 219 This can also be observed in every representative inset graph of Fig. 2A,B with significant initial  
 220 avoidance.

221 Taken together, these results show that non-noceptive vibration response in *Drosophila* larvae  
 222 is not linear, and in fact shows significant signs of habituation (or de-sensitization), which we explore  
 223 more comprehensively in the sections to follow.



## 224 **Re-sensitization rates increase after repeated vibration pulses**

225 *Drosophila* larvae rapidly adapt to continuous vertical vibration, where their fractional usage of  
226 reversal and stopping behaviors returns to their baseline, no-stimulus levels (seen in Fig. 4C). We  
227 characterize this as an exponential decay of strong avoidance behavior,

$$F_{REV}(t) = F_{0,REV} e^{-t/\tau_{des}} \text{ [OFF} \rightarrow \text{ON]}, \quad (3)$$

228 where  $\tau_{des}$  is the de-sensitization time constant, and  $t = 0$  indicates the onset of the stimulus. Fitting  
229 an exponential to the continuous response data, we find  $\tau_{des} = 18.9$  s, for wild type larvae exposed  
230 to ( $f = 500$  Hz,  $\Gamma = 2$ ) vibration.

231 The fact that strong avoidance behavior (measured by  $F_{REV}$ ) is not the same for each vibration  
232 pulse in a repeated sequence implies that larvae do not immediately reset or clear habituation to  
233 the stimulus. Thus there is another important time constant, for re-sensitization (or de-habituation)  
234 to mechanical vibration while the stimulus is off. We describe this by

$$F_{REV}(T_{OFF}) = F_{0,REV}(1 - e^{-T_{OFF}/\tau_{res}}) \text{ [ON} \rightarrow \text{OFF]}, \quad (4)$$

235 where here  $t = 0$  marks the ON→OFF stimulus transition, the time  $T_{OFF}$  marks the return of  
236 vibration, and  $\tau_{res}$  is the re-sensitization time constant. Determining  $\tau_{res}$  requires substantially more  
237 experiments than for  $\tau_{des}$ , because one must systematically vary  $T_{OFF}$  in separate experiments to  
238 construct the shape of the function in Eq. 4. Figure 5A shows the re-sensitization process for wild  
239 type larvae exposed to ( $f = 500$  Hz,  $\Gamma = 2$ ) vibration, and we find  $\tau_{res} \approx 5$  s describes de-habituation  
240 following the first vibration pulse under these conditions.

241 We also investigated whether the time constant  $\tau_{res}$  is in fact constant over the repeated vibration  
242 pulses in a longer stimulus sequence. Using timing settings of  $T_{ON} = 30$  s (sufficient for the  
243 population to habituate to its baseline  $F_{REV}$  level) and a variable  $T_{OFF}$ , we determined separate  $\tau_{res}$   
244 at each  $n = 0, 1, 2, \dots$  pulse. We find (Fig. 5B,C) that the re-sensitization rate increases dramatically:  
245 by the  $n = 4$  vibration pulse, the return to the sensitivity level of the previous pulse (that is,  
246  $F_{4,REV}/F_{3,REV} \approx 1$ ) happens in less than 1 s. We also note that turning off vibration does not in itself  
247 affect the fraction of larvae that perform reverse crawl behavior, although the fraction of larvae  
248 that stop does decrease temporarily (Fig. 5D), consistent with a “relief” period following the removal  
249 of an aversive stimulus (Denny (1976)).

250 To determine whether  $\tau_{des}$ ,  $\tau_{res}$ , and ( $\tau_{res}$  vs.  $n$ ) are sufficient to explain the habituated responses  
251 to vibration stimuli, we used the three features to construct a predictive function for  $F_{REV}(t)$  for a  
252 distinctly different repeated pulse stimulus input. Using ( $f = 500$  Hz,  $\Gamma = 2$ ,  $T_{ON} = 10$  s,  $T_{OFF} = 20$  s)  
253 as vibration conditions, we compare empirical  $F_{REV}(t)$  to that predicted by the extracted constants  
254 (Fig. 5E). The predictive function is

$$F_{REV}(t) = F_{0,REV} \cdot \sum_n [1 - e^{-T_{OFF}/\tau_{res}(n-1)}] \cdot e^{-(t-nT)/\tau_{des}} \quad (5)$$

255 when the stimulus is ON following the  $n^{th}$  vibration pulse, and  $F_{REV}(t) = 0$  when the stimulus is OFF.  
256 The predictions disagree at later times without the  $\tau_{res}$  vs.  $n$  dependence, but show agreement when  
257 that element is included.

258 Taken together, we have determined that larvae habituate and de-habituate (or de-sensitize and  
259 re-sensitize) on distinct time scales, and that re-sensitization becomes an extremely fast process  
260 after several vibration pulse repetitions, indicating an additional layer to the adaptation process.

## 261 **Memory deficient mutants possess distinct habituation time constants**

262 We investigated whether strains of *Drosophila* known to have learning and memory deficiencies  
263 have different habituation profiles compared to wild type strains. Specifically: (i) the desensitization  
264 to continuous vibration, characterized by  $\tau_{des}$ ; (ii) the re-sensitization to vibration after stimulus  
265 removal, characterized by  $\tau_{res}$ ; and (iii) the changing re-sensitization rate after repeated pulse  
266 exposure, characterized by  $\tau_{res}$  vs.  $n$ . Three mutant strains were tested: *rut*, lacking the Rutebaga

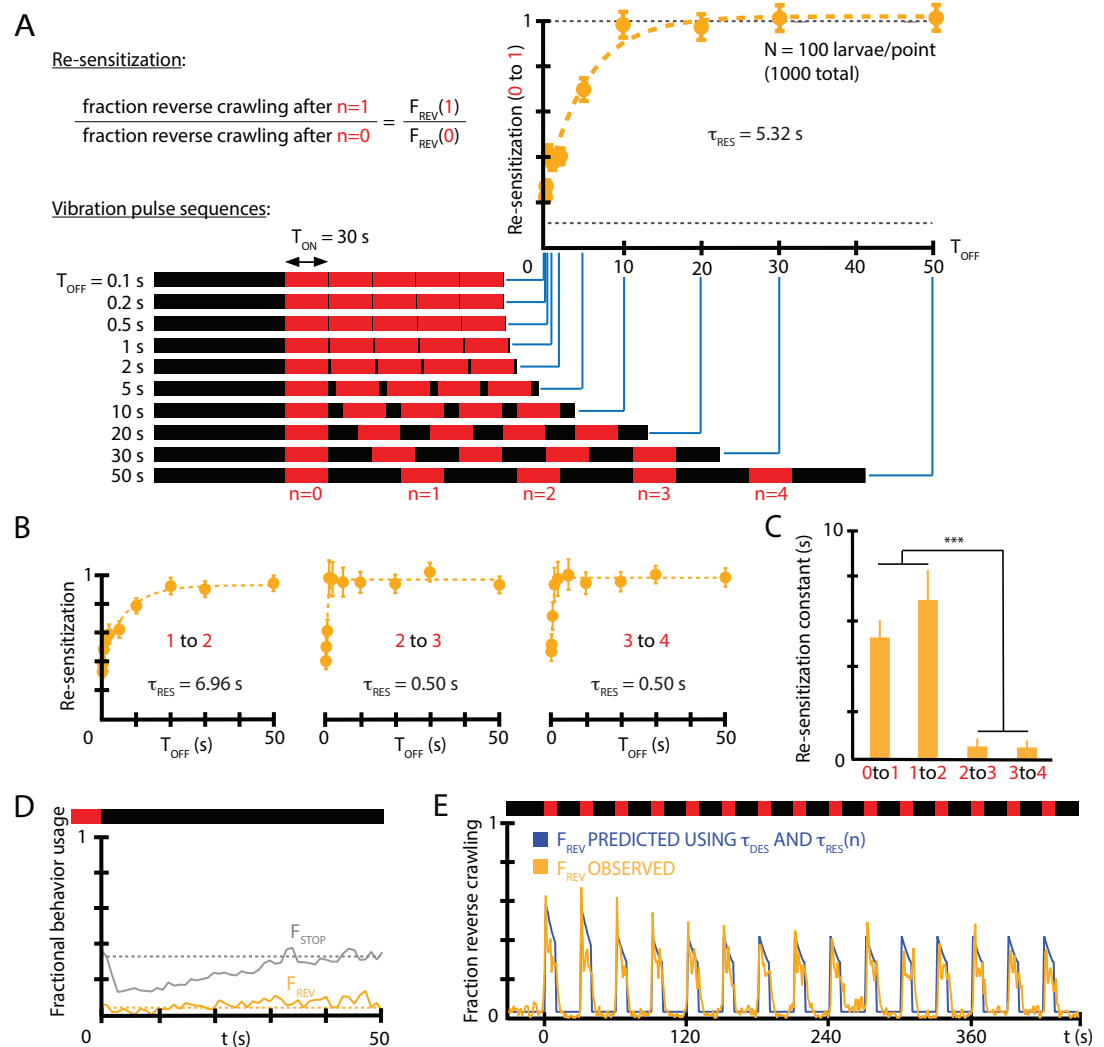

**Figure 5.** Re-sensitization after removal of mechanical stimulus depends on prior vibration pulses. (A) Visualization of vibration pulse sequence experiments used to determine re-sensitization to the stimulus. Time  $t = 0$  indicates the start of the initial ( $n = 0$ ) vibration pulse period, lasting  $T_{ON} = 30$  s (red). The stimulus is removed between pulses for varying amounts of time  $T_{OFF}$ . Recovery of sensitization is determined for each pulse  $n$  by computing the ratio  $F_{n,REV}$  to  $F_{n-1,REV}$ , normalized to account for incomplete recovery for short  $T_{OFF}$  times. Lower dashed line indicates baseline (no stimulus) reversal fraction. (B) Re-sensitization as a function of the time  $T_{OFF}$ , determined for the  $n = 1$ ,  $n = 2$ ,  $n = 3$ , and  $n = 4$  pulses. Vibration intensity was  $f = 500$  Hz,  $\Gamma = 2$ . Each data point is the average from 5 experiments of  $\approx 20$  animals each, for a total of 1000 larvae from 50 experiments. Error bars are s.e.m. (C) Re-sensitization time constants as a function of vibration pulse number  $n$ .  $\tau_{res}$  was determined from fits of the data in (A) and (B) (Eq. 4). After two vibration pulses, the re-sensitization is significantly faster (\*\*\* indicates  $P < 0.001$ ). (D) Behavioral response to the ON  $\rightarrow$  OFF stimulus transition:  $F_{REV}(t)$  and  $F_{STOP}(t)$ , where  $t = 0$  indicates the stimulus OFF transition.  $F_{REV}$  is unaffected. Vibration conditions ( $f = 500$  Hz,  $\Gamma = 2$ ,  $T_{ON} = 50$  s,  $T_{OFF} = 30$  s). Data points are the average of  $F_{STOP}$  (gray) and  $F_{REV}$  (orange) up to the  $n = 9$  pulse. Dashed lines indicate the baseline behavior fractions while the stimulus is ON. (E) Comparison of a habituation model with  $\tau_{des}$ ,  $\tau_{res}$  and  $\tau_{res}$  vs.  $n$  dependence (blue) to empirical strong avoidance behavior  $F_{REV}(t)$  (orange).

267 gene; *dnc*, lacking the Dunce gene; and *cam*<sup>0</sup>, a calmodulin null mutant. We focused on the stronger,  
268 reverse crawl aversive response, observing  $F_{REV}(t)$  for each strain.

269 In response to continuous vibration (Fig. 6A), all three mutant strains have habituation time  
270 constants significantly different from wild type, with *rut* the fastest adaptation ( $\tau_{des} = 5.2$  s), *cam*<sup>0</sup>  
271 the slowest (25.6 s), and *dnc* in between (14.3 s). The wild type desensitization time (from Fig. 4B)  
272 was 18.9 s. The *dnc* mutant also has a distinct, short time scale peak in reverse crawl response, not  
273 seen in the other three strains.

274 As observed above (Fig. 5E), wild type response to repeated pulses consists of repeated shapes  
275 of  $F_{REV}(t)$ , but at diminished magnitude, indicating an incomplete return to the baseline level of  
276 sensitivity. We measured the recovery of vibration sensitivity for the three mutants in Fig. 6B, and  
277 as before we calculate the ratio  $F_{n,REV}/F_{n-1,REV}$  as a function of  $T_{OFF}$  to extract re-sensitization  
278 times between each pair of sequential vibration pulses in the stimulus sequence. After the initial  
279 ( $n = 0$ ) pulse, wild type larvae recover with a time constant of  $\tau_{res} = 5.3$  s, much shorter than the  
280 de-sensitization time following the initial onset of the stimulus. The three mutant strains re-sensitize  
281 with distinct time constants 3.6 s (*rut*), 6.5 s (*cam*<sup>0</sup>), and 9.8 s (*dnc*), with these times significantly  
282 different from each other, but only *dnc* significantly different from wild type. All three mutants  
283 share the feature that  $\tau_{des} > \tau_{res}$ , where de-habituation occurs more rapidly than habituation.

284 As with wild type (Fig. 5C), all strains exhibit substantially faster re-sensitization after the third  
285 pulse compared to after the first and second pulses. The  $\tau_{res}$  vs.  $n$  relationship is shown directly for  
286 all three strains in Fig. 6C. The *cam*<sup>0</sup> mutants specifically show a dramatic drop in  $\tau_{res}$  even after the  
287 second pulse, with nearly instantaneous recovery: the strain with the slowest habituation is the  
288 fastest to de-habituate after repeated stimulus pulses.

289 Put together, we find that each mutant exhibits distinct deviation from typical wild type behavior,  
290 making it important to separate the three parameters that describe adaptation to mechanical  
291 agitation. To fully understand the molecular mechanisms behind habituation and its component  
292 time constants is beyond the scope of this paper. However, these results suggest the need to  
293 describe habituation with at least these three parameters, each of which may have distinct cellular  
294 or molecular underpinnings.

## 295 **An electric circuit model is analogous to habituation**

296 Our findings so far suggest that the process underlying habituation is based on some mechanism  
297 that involves activation and recovery. The overall response of *Drosophila* larvae to vertical vibration  
298 depends on both intensity ( $f, \Gamma$ ) and timing ( $T_{OFF}, T_{ON}$ ) characteristics. The reverse crawl behavior  
299 is generally only seen when the vibration intensity crosses a threshold in  $f - \Gamma$  space (Fig. 2). We  
300 also found that the deployment of reverse crawling (measured by  $F_{REV}$ ) decreases sharply during  
301 extended or repeated vibration bouts, back towards baseline behavior (Fig. 4). Further, we found  
302 that  $F_{REV}$  returns to its original sensitivity for subsequent vibrations, dependent on the stimulus  
303 off-time  $T_{OFF}$ , and the vibration pulse number  $n$  (Fig. 5). We seek to establish an electric circuit  
304 model of the habituation process, using a circuit with a small number of components that can  
305 reproduce the desensitization observed in behaving larvae.

306 We model the situation in the larva as follows. During exposure to a stimulus, a binary process  
307 is switched on and then reset upon termination of the stimulus. The process contributes a discrete  
308 amount to a quantity  $Q$ , which is related to the probability  $P$  that a particular behavioral output (for  
309 example, one of the four responses shown in Fig. 1C) will occur during the subsequent onset of the  
310 stimulus. If the frequency of these on/off switches increases, then the frequency of contributions to  
311  $Q$  also increases. If  $Q$  also decays on its own over time, then the two separate mechanisms (discrete  
312 contribution to  $Q$  and decay of  $Q$ ) will together determine the overall probability of the behavioral  
313 response, similar to our observed adaptation behavior in larvae. We note that specifically  $Q$  is  
314 proportional to  $-\ln P$ . Using these features, we describe a capacitor switch circuit to represent a  
315 possible biological mechanism responsible for habituation in larvae.

316 The capacitor switch circuit is shown in Fig. 7. Consider the circuit's behavior for the two switch

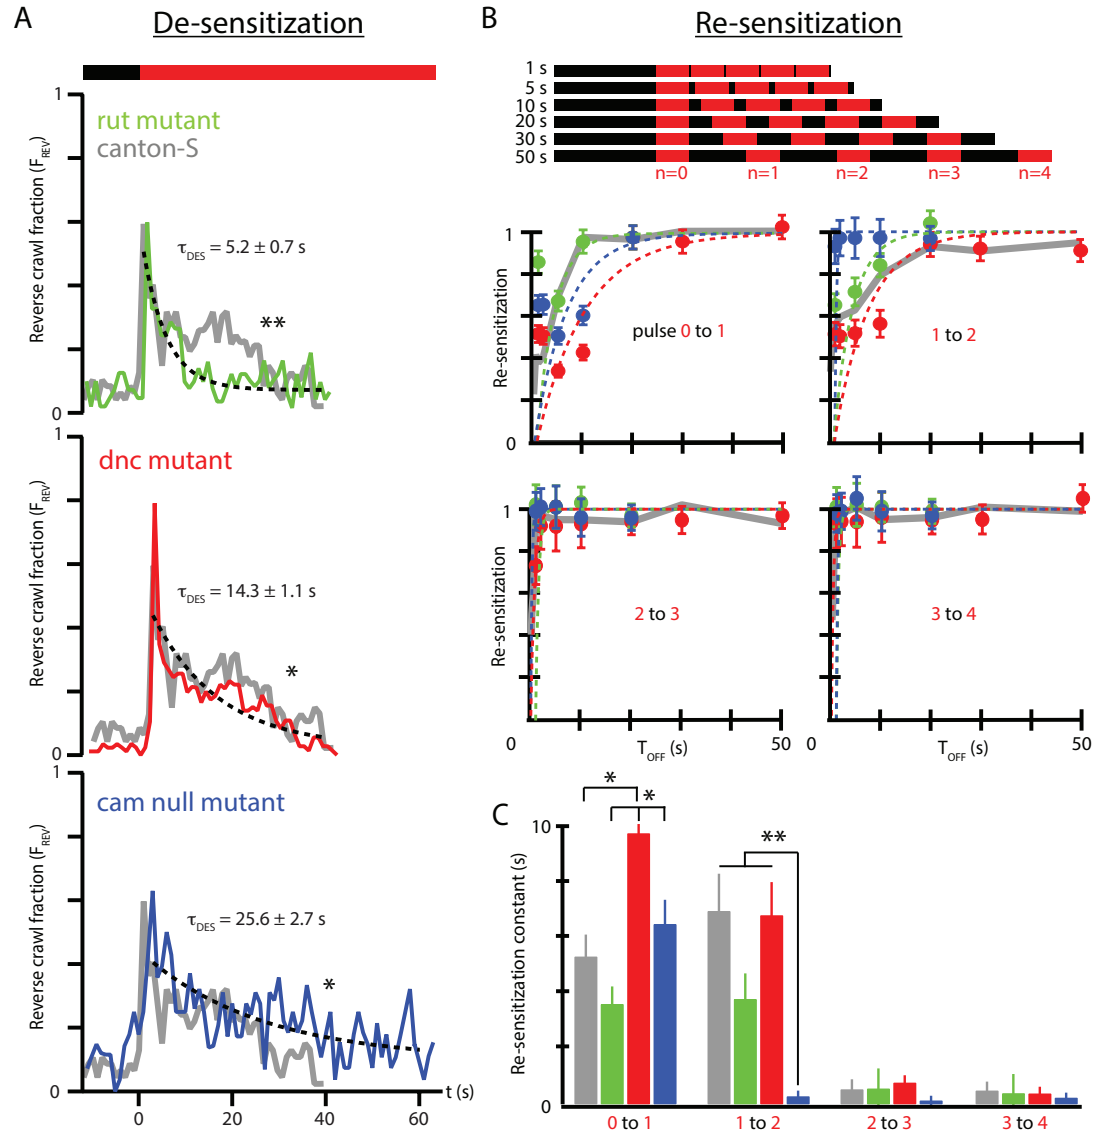

**Figure 6.** Memory-deficient mutants have distinct habituation and de-habituation time constants. (A) De-sensitization: reverse crawl behavior usage in response to continuous vibration stimulation.  $F_{REV}$  vs.  $t$  (where  $t = 0$  marks the vibration onset) for three mutants: *rut* (green), *dnc* (red), and *cam*<sup>0</sup> (blue). Gray traces are the Canton-S wild type response from Fig. 4B. Vibrations were  $f = 500$  Hz and  $\Gamma = 2$ . Each trace is based on 5 experiments, with 20 larvae in each. (B) Re-sensitization to vibration following repeated pulses. Top: schematic of experiments performed. Bottom: plots of  $F_{n,REV}/F_{n-1,REV}$  vs.  $T_{OFF}$  after the  $n^{\text{th}}$  pulse for *rut* (green), *dnc* (red), and *cam*<sup>0</sup> (blue). Gray traces are the Canton-S wild type response from Fig. 5. Vibrations were  $f = 500$  Hz and  $\Gamma = 2$ . Each point is based on 5 experiments, with 20 larvae in each, for a total of 75 experiments and  $\approx 1500$  larvae. Error bars indicate s.e.m. (C) Desensitization and Re-sensitization time constants as functions of pulse number  $n$  for the same three mutants, based on fits to the data in B. Error bars indicate s.e.m. \* indicates  $P < 0.05$  and \*\* indicates  $P < 0.01$ .

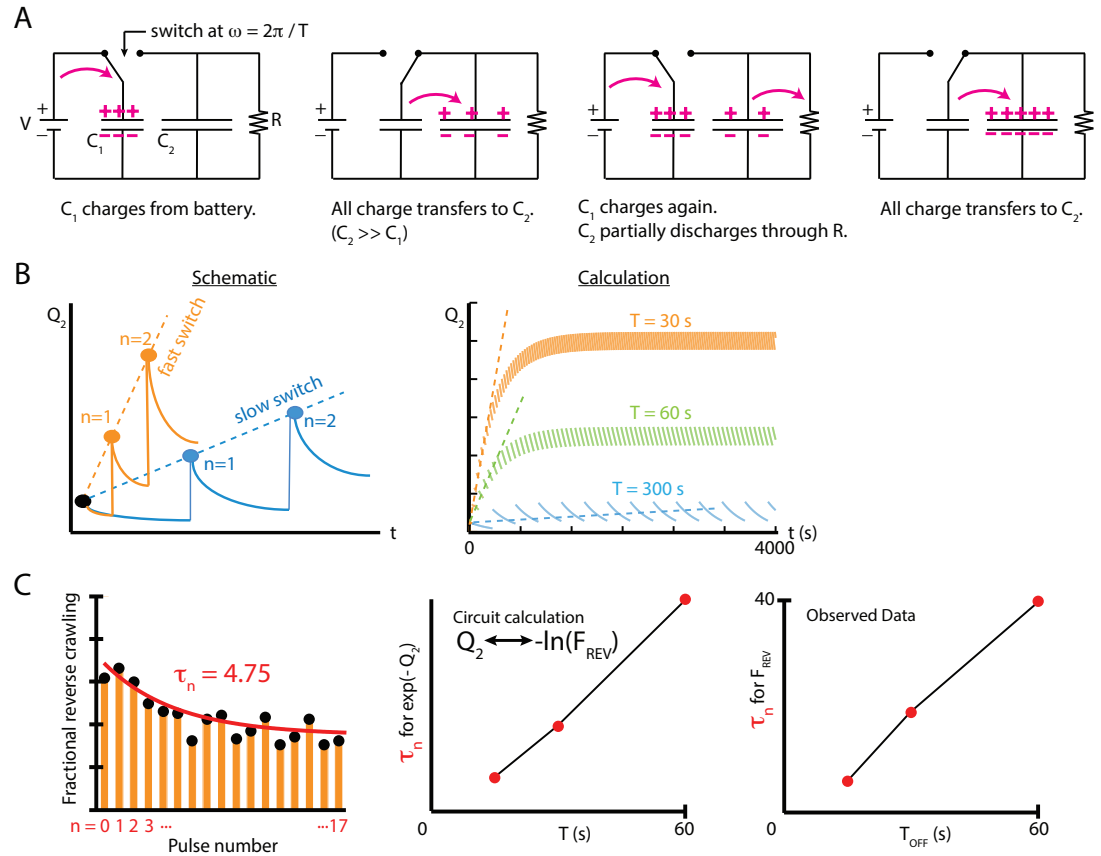

**Figure 7.** An electric circuit models possible mechanisms for larval habituation. (A) The capacitor switch circuit, where a small capacitor  $C_1$  is continually charged by a battery  $V$ , and discharges to a larger capacitor  $C_2$  each time the switch changes. The charge  $Q_2$  is related to the probability  $P$  of observing an external event ( $Q_2 = -\ln P$ ). (B) Functions  $Q_2(t)$  created by varying the duration of the charging phase of the circuit,  $T$ , while holding the circuit elements constant. Left: a visual schematic of such functions. Right:  $Q_2(t)$  generated by simulating the circuit behavior. In each case, after enough switches, the charge saturates when the charging from  $C_1$  to  $C_2$  balances the charge dissipated through  $R$  for each cycle. For values of  $T$  much smaller than  $RC_2$ , this saturation will only occur at a large  $n$ . (C) Decay in response over multiple switches/pulses. Left:  $F_{REV}$  data from Fig. 3A, with the peaks fit to an exponential with decay constant  $\tau_n$  describing the number of repeated vibration pulses that occur before  $1/e$  response reduction. Center: electrical circuit calculation of  $\tau_n$  vs  $T$  with  $Q_2$  analogously related to the probability of reverse behavior by  $F_{REV} \sim e^{-Q_2}$ . Right: empirically observed  $\tau_n$  vs.  $T_{OFF}$ , showing a trend similar to the capacitor circuit, where  $\tau_n$  increases linearly with the off time between stimulus applications.

317 positions. In the left position (“OFF”), a battery of voltage  $V$  quickly charges capacitor  $C_1$ , which then  
318 holds charge  $Q_1 = C_1 V$ . In the right position (“ON”) a second capacitor  $C_2$  gains charge from  $C_1$  each  
319 time the switch is closed. We assume  $C_2 \gg C_1$ , so the full amount  $Q_1$  is transferred each time the  
320 switch moves to the ON position. Additionally, the charge in the second capacitor,  $Q_2$ , is slowly  
321 dissipated through the large resistor  $R$ . As a function of time, the charge  $Q_2$  will depend on the  
322 frequency  $\omega$  at which the switch closes (or equivalently its period  $T = 2\pi/\omega$ ), each time delivering a  
323 discrete quantity of charge  $Q_1$ , and depend on the flow charge from  $C_2$  through  $R$ . Put together,  $Q_2$   
324 will be a summation of decaying step functions

$$Q_2(t) = \sum_{n=0}^{\infty} C_1 V \theta(t - nT) e^{-\frac{t-nT}{RC_2}}, \quad (6)$$

325 where  $n$  denotes the  $n^{\text{th}}$  closing of the switch, and  $\theta$  is a Heaviside function whose steps occur at  
326 each switch closing. We assume that  $C_2$  is initially uncharged. The term  $RC_2$  is a time constant  
327 describing the decay of  $Q_2$ .

328 As noted above,  $Q_2$  is related to the probability  $P$  of an external observed event, by  $P = e^{-Q_2}$ .  
329 Thus the fraction of measurements where the event is observed,  $F$ , can be written

$$F_{\text{event}} = F_0 \exp \left[ - \sum_{n=0}^{\infty} C_1 V \theta(t - nT) e^{-\frac{t-nT}{RC_2}} \right], \quad (7)$$

330 where  $F_0$  is the fraction of measurements where the event occurs when there is no charge on the  
331 capacitor  $C_2$ .

332 The capacitor switch circuit system exhibits behavior similar to what we observe empirically  
333 in larval habituation. The event fraction  $F_{\text{event}}$  observed during the “ON” switch of the circuit is  
334 analogous to the observed reverse crawl deployment fraction  $F_{REV}$ . The charge  $Q_2$  on capacitor  $C_2$   
335 (Eq. 6) represents a physical component of the mechanism responsible for larval habituation, such  
336 as the presence of a cytosolic concentration of a chemical or the buildup of a neurotransmitter  
337 between synapses. The repeated, discrete discharging from  $C_1$  to  $C_2$  is similar to the discrete  
338 contributions to desensitization caused by repeated exposure to a stimulus at some frequency; the  
339 period  $T$  of such discharges determines how quickly the larvae habituate. In addition, the resistor  $R$   
340 is analogous to the recovery of the larvae, which tends to impede habituation for long time intervals,  
341 and the resistance may change over time to reflect the variation observed in  $\tau_{res}$ . To extend the  
342 analogy, activating the switch requires external conditions above some threshold level, and those  
343 corresponding conditions are the parameters  $f$  and  $\Gamma$  for mechanical agitation; below the weak  
344 vibration threshold, the reverse crawl behavior is rarely observed.

345 To draw a more direct comparison between the circuit model and observed crawling behavior,  
346 we characterize the response of both systems to repeated switching / vibration pulses. We plot  $F_{REV}$   
347 vs.  $n$  (Fig. 7C) and extract a dimensionless decay constant  $\tau_n$ . We expect the time between pulses ( $T$   
348 in the circuit,  $T_{OFF}$  in larva behavior) to strongly affect this decay constant: without sufficient time  
349 for sensitivity to reset (small  $T$ ) desensitization will rapidly eliminate the behavior, and with full reset  
350 (large  $T$ ) response strength should not decay at all. With the charge  $Q_2$  related to the probability of  
351 a behavior ( $Q_2 \sim -\ln F_{REV}$ ), we observe very similar, linear  $\tau_n$  vs.  $T$  relationships in both the circuit  
352 system and in our empirical behavioral results (Fig. 7C). This result may imply that habituation to  
353 a stimulus is based on a biological process that mimics the parameters of the capacitor-switch  
354 circuit. This would account for how larval habituation between stimulus applications depends on  
355 the parameters  $T_{OFF}$  and  $n$ , as well as the activation threshold in  $f - \Gamma$  space for  $F_{REV}$ .

## 356 Discussion

357 This study has investigated the response to vertical vibration of the *Drosophila* larva, which deploys  
358 a range of behaviors depending on context. The severity of the response (from no response, to  
359 pausing, to turning, to reversing) reflects both the severity of the stimulus (a combination of force  
360 and frequency) and the recent history of the stimulus. Nearly all larvae stop moving upon initial

361 exposure to high intensity vibrations (Fig. 2B), and use the strongest reverse-crawl response in  
362 a large fraction of cases. However, we found that the reverse-crawl response diminishes, and  
363 behavior returns to the non-stimulus baseline level over less than 30 s of sustained vibration. Hence,  
364 a comprehensive description of behavioral response to vibration necessarily includes time constants  
365 characteristic of adaptation: a desensitization time, and a re-sensitization time (Figs. 4 and 5). Our  
366 general characterization of vibration response, combined with our result that memory-deficient  
367 mutants exhibit anomalous de- and re-sensitization (Fig. 6), and our electric circuit model (Fig. 7),  
368 informs a discussion of possible mechanisms behind vibration response and habituation.

### 369 **Possible mechanisms for vibration response and habituation**

370 Interaction between the peripheral nervous system (PNS) and the central nervous system (CNS)  
371 should determine behavioral response to vibration. The more severe and less spontaneous reverse-  
372 crawl response ( $F_{REV}$ ), for example, could operate analogously to our circuit model (Fig. 7), with the  
373 PNS controlling the switch, and the CNS acting as the capacitor  $C_2$  and mediating signals sent to the  
374 muscles. The diminished fraction of  $F_{REV}$  after repeated pulses could be explained by biological  
375 processes that affect the number of signals sent to the muscles via the CNS, such as cAMP inhibition,  
376 a decrease on neuronal excitability, or both.

377 The fact that *dnc* mutants re-sensitize more slowly after stimulus removal may point to cAMP  
378 as important for the response process: *dunce* encodes cAMP-specific phosphodiesterase (PDE)  
379 (Conti et al. (2003)), which breaks down cAMP and affects cAMP metabolism and synaptic plasticity  
380 (Zhong and Wu (1991); Waltereit and Weller (2003)). The enzyme PDE thus could be important for  
381 the sensory recovery of larvae in general. Furthermore, cytosolic cAMP concentration (analogous  
382 to  $Q_2$ ) within a subset of the CNS (analogous to  $C_2$ ) may relate to weaker behavioral response  
383 due to habituation, similar to the circuit model like  $F_{REV} \sim \exp(-[C_{cAMP}])$ . Studies of memory in  
384 *Drosophila* have shown trends similar to this relationship, and demonstrated effects of *dnc* on  
385 habituation to olfactory stimuli (Engel and Wu (2009); Dudai (1988); van Swinderen (2007); Rees  
386 and of Spatz (1989)). *Dunce* mutants *dnc* were used to establish the role of the cAMP cascade in  
387 neuromuscular transmission that mediates the habituated response, analogous to the discrete  
388 activation of the signaling pathway (charging capacitor  $C_2$  in the circuit model) (Zhong and Wu  
389 (1991)). This possibility is supported by the fact that calmodulin null mutants, which lack the ability  
390 to convert ATP to cAMP in cells exhibit an anomalous reverse crawl behavior compared to wild-type  
391 larvae (Heiman et al. (1996)). Furthermore, *dnc*, despite being expressed throughout neuropil, is  
392 concentrated in mushroom body (MB) neurons (Nighorn et al. (1991); Han et al. (1996)) and studies  
393 investigating olfactory habituation in larvae point to the alteration in the excitability of post-synaptic  
394 MB neurons as crucial to the process. MB neurons could play a role in habituation behavior for  
395 mechanosensation (Davis (1993); Engel and Wu (2009); Hollis and Guillette (2011); Neckameyer  
396 (1998)), which would indicate a significant crossover between the neural mechanisms responsible  
397 for mechanosensitive and olfactory habituation.

398 Past studies investigating a similar mechanical response in *C. elegans* have established that the  
399 mechanism responsible for habituated behavior depends on interactions between PNS neurons and  
400 proprioceptor neurons in the CNS (Stopfer and Carew (1996); Rosen et al. (1979); Rose and Rankin  
401 (2001)). These neurons correspond to dendritic and chordotonal neurons respectively in *Drosophila*  
402 larvae (Tuthill and Wilson (2016)). Given that cAMP-signaling cascades and neural excitability  
403 have been established as important processes related to the short-term plasticity of chordotonal  
404 neurons in general (Waltereit and Weller (2003); Zhong and Wu (1991)), it is possible that the  
405 mechanosensitive habituated response mechanism in larvae is dependent on processes at the  
406 post-synapse of these neurons, in a manner similar to habituation in *C. elegans* (Bozorgmehr et al.  
407 (2013)). Thus a possible explanation for mechanosensitive habituation in larvae is the activation  
408 of postsynaptic ion channels during stimulation, specifically, voltage-dependent potassium ion  
409 channels modulated by neurotransmitter signaling at the post-synapse of motor neurons. These  
410 ion channels could significantly decrease the neuronal excitability of the motor neuron to which they

411 are attached. If a subset of these motor neurons in *Drosophila* are involved in the circuit for reverse  
412 crawling, then activation of the ion channels would decrease the likelihood of a “reverse crawl signal”  
413 sent by a neuron, and thus decrease the probability the behavior is performed. Such a mechanism  
414 has been identified in the mechanosensory circuit of *C. elegans* (Bozorgmehr et al. (2013)), and is  
415 a promising candidate in *Drosophila* since it could more effectively account for the dependence  
416 of re-sensitization on  $T_{OFF}$ . In addition, the mechanism is most analogous to the capacitor switch  
417 circuit model, whereby calcium ions act as the charge  $Q_2$  and the inter-neural channel acts as  $C_2$ .  
418 As neurons reset following action-potential activation, the calcium concentration in the region is  
419 slowly reduced, whereas the amount of calcium added is dependent on the discrete activation  
420 of presynaptic dendritic neurons. GABA, which has been identified as crucial for larval olfactory  
421 habituation (Larkin et al. (2010)) and shown to bind to input sites on other invertebrate chordotonal  
422 neurons (PANEK et al. (2002); Cattaert et al. (1992); Burrows and Laurent (1993)), could potentially  
423 regulate the activation threshold of the described ion channels. Other types of neurotransmitters,  
424 such as glutamate or dopamine, may also play a role in larval mechanosensitive habituation in  
425 chordotonal neurons.

## 426 Conclusions

427 In our investigation of the *Drosophila* larva’s response to vertical vibration, we have particularly  
428 focused on the deployment of discrete physical motor actions, and how the animal’s use of each  
429 behavior changes over time due to habituation. We found that adaptation is a very strong effect,  
430 shown by the linear time invariant (LTI) model’s failure to capture the empirical response. Because  
431 these experiments captured both population-level and single-larva movement, we were able to  
432 confirm that transitions between behavioral states closely approximate a one-way habituation  
433 model, where weaker avoidance behavior replaces stronger behaviors, and individual animals will  
434 very rarely reverse crawl after switching to a milder response. Three adaptation parameters were  
435 necessary to account for the response to a sequence of vibration pulses: a desensitization time  
436 scale ( $\tau_{des}$ ) for a continued stimulus, a re-sensitization time scale ( $\tau_{res}$ ) for robustness to return in  
437 the absence of the stimulus, and the shortening of  $\tau_{res}$  after repeated pulses. We gained insight into  
438 potential mechanisms behind this highly adaptive response, first through behavior experiments with  
439 larval mutants, which exhibited distinct variations in the three adaptation parameters compared to  
440 wild type; then through comparison with our charge transfer electric circuit model, which appears  
441 to map to distinct parameters of the observed behavior in a manner indicative of information  
442 retention producing an altered behavioral output in larvae.

443 Several directions for further study are apparent. Because the animal’s response to vertical  
444 vibration depends on both the vibration’s severity (force and frequency) and its recent history  
445 (number of pulses and ON/OFF times in our framework), the parameter space for a complete  
446 mapping of stimulus input to behavioral output is very large. A combination of improved hardware  
447 to explore a larger range of input conditions and novel stimulus delivery (such as noise stimulus  
448 with reverse correlation analysis) could cover a broader range of responses, and generate more  
449 directly testable mathematical functions that predict probabilities of each behavior. How vibration  
450 combines with other sensory inputs to produce a multisensory integration output is also an  
451 interesting question, especially because vibration response is highly nonlinear and dominated by  
452 habituation, whereas many other stimuli yield more straightforward responses. Finally, because the  
453 fly larva is such an optically and genetically addressable system, interrogating the neural circuits  
454 involved in adaptation should prove fruitful. For temperature, odors, and other stimuli, optical  
455 calcium or voltage imaging of the sensory neurons and central brain can be performed during  
456 stimulus delivery, and a miniature version of the vibration system used here could allow the same  
457 for vertical vibration. Because habituation forms so quickly in the larva, the system should be ideal  
458 for monitoring desensitization and re-sensitization in the brain in real time.

459 Understanding the biological process responsible for mechanosensitive habituation in larvae is  
460 an area for potential continued research. This study has investigated a few important aspects of the



461 habituated behavior in larvae, and shown that these observations are indicative of a process which  
462 employs neural mechanisms on very short time scales to induce plasticity. The neurophysiological  
463 and biological processes which take place within *Drosophila* larvae to cause habituation are, in  
464 general, suited to the organism's most general purpose of survival, and may serve a wider role  
465 in the survival of more complex organisms which must navigate random and complex natural  
466 environments. Mechanical agitation is a useful stimulus for attempting to decipher the habituation  
467 phenotype and its underlying mechanisms.

## 468 **Materials and Methods**

### 469 **Vertical vibration and image acquisition**

470 The top piece of an electromechanical transducer (EMT) (ET-132-203, LabWorks Inc.) is displaced  
471 upward and downward. An aluminum plate (230 × 230 × 1.8 mm) with a hole drilled in the center  
472 was placed atop a steel damping plate (150 × 150 × 5 mm), also with a hole drilled in the center.  
473 These two plates were then screwed into the top of the EMT. The steel plate reduced the strength  
474 of vibrational nodes in the system. The EMT was placed atop a 3-mm-thick rubber sheet to prevent  
475 the migration of the device during testing.

476 The EMT was driven by a sine wave controller (SG-135, LabWorks Inc.) and an amplifier (PA-151,  
477 LabWorks Inc.) that provided ac current up to 2.5 A at the frequency specified by the controller.  
478 A small accelerometer with a flat end was used to measure the peak acceleration of the agar gel  
479 placed on the aluminum plate at various locations (20 – 30 points), both for calibration and to  
480 determine spatial variation in  $\Gamma$ . The typical variation was  $< 0.1$ , with maximum variation  $\delta\Gamma \approx 0.3\Gamma$   
481 only observed at low frequencies.

482 The connection between the power amplifier and the EMT was interrupted by a solid state relay  
483 (4D1225, Crydom) to allow for computer control of the ON and OFF states of vibration pulses, via a  
484 USB DAQ device (U3-LV, LabJack) Using custom software written in LabView, the vibration signals  
485 were sent to the EMT according to the desired  $T_{ON}$  and  $T_{OFF}$  timing.

486 The electromechanical transducer was placed within a sealed box along with four printed circuit  
487 boards (PCBs) with red LEDs, and a camera directly over the crawling surface. Each PCB had 48  
488 lights, with 12 sets of four lights and a current regulator. The LED boards were held in place by  
489 custom PLA stands made by a 3D printer (Ultimaker 2), and powered by a 12 V dc power supply  
490 (SE-350-12, Meanwell). The LEDs were held slightly above the gel surface, facing inward, to provide  
491 dark field illumination of the crawling animals.

492 A 5 MP CCD camera (acA2500-14, Basler) was attached to the top beam of the box. Image  
493 acquisition software (same as used in *Gershow et al. (2012)*) was modified to synchronize with  
494 the vibration control software, so vibration pulse sequences matched the timing of the behavior  
495 recordings. Typically we recorded 90 s of behavior prior to the first vibration period. The images  
496 were recorded at 15 frames per second.

### 497 **Data Analysis**

498 We used a modified version of the MAGAT Analyzer, which determines the position and contour  
499 of each larva throughout a recording, segments trajectories into straight-crawling “runs” and  
500 reorienting “turns”, and determines numerous parameters like velocity, body bend angle, and so  
501 on (*Gershow et al. (2012)*). Custom MATLAB scripts flagged the four primary response behaviors  
502 of interest here (continuation, pause, turn, reversal). We computed the dot product of the head  
503 orientation vector and the velocity vector, with negative values indicating reverse crawling.

504 Curve fits characterizing habituation were performed by fitting  $F_{REV}(t)$  data to the function  
505  $y_0 + A \exp(-t/\tau)$  for both desensitization and re-sensitization, with  $y_0$  fixed to be the baseline  $F_{REV}$   
506 value and the other parameters free. Uncertainty in the fits, and comparison between different  
507 fits, was determined using the following steps: (1) A simulated value of  $F_{REV}$  at each time point (1 s  
508 spacing) was pulled from a gaussian distribution centered at the mean value with the s.e.m. as

509 the width, and the exponential fit was performed on this generated set of points; (2) This step was  
510 repeated 1000 times, and the standard deviation of the set became the uncertainty of the original  
511 curve fit; (3) Significance tests between different exponential fits (for example, the wild type vs.  
512 mutant strains) were performed as standard Student's t-tests, using the set of 1000 fit values, but  
513 with the z-scores using standard deviation instead of s.e.m., obtained by multiplying the calculated  
514 z-score by  $\sqrt{1000}$  (otherwise the number of simulated fits would affect statistical significance). The  
515 P-values in Fig. 6 are denoted with \* symbols explained in the caption. Actual values comparing  
516 desensitization time constants in Fig. 6A are  $P < 0.0001$  (*rut/CS*),  $P = 0.011$  (*dnc/CS*), and  $P = 0.026$   
517 (*cam<sup>0</sup>/CS*).  $P < 0.0001$  for all pair-wise comparisons between the three mutant strains. Actual values  
518 comparing re-sensitization time constants in Fig. 6C are  $P = 0.38$  (*cam<sup>0</sup>/CS*),  $0.007$  (*cam<sup>0</sup>/rut*),  $0.003$   
519 (*cam<sup>0</sup>/dnc*),  $0.07$  (*rut/CS*),  $0.0001$  (*dnc/CS*), and  $< 0.0001$  (*rut/dnc*) for the first re-sensitization; then  $P =$   
520  $0.0099$  (*cam<sup>0</sup>/CS*),  $0.0002$  (*cam<sup>0</sup>/rut*),  $< 0.0001$  (*cam<sup>0</sup>/dnc*),  $0.23$  (*rut/CS*),  $0.98$  (*dnc/CS*), and  $0.03$  (*rut/dnc*)  
521 for the second re-sensitization.

522 No explicit power analysis was used to compute sample size in the initial design of our study, but  
523 we recorded repeated experiments until the fractional SEM was small. The most common number  
524 of 100 animals per experimental condition was more than sufficient to distinguish most behavioral  
525 differences, consistent with prior work in fly larva behavior. Most commonly 20 larvae were placed  
526 together on the gel in the vibration arena for each experiment, which balances high throughput  
527 with larva-larva interactions becoming too frequent, and is commonly used in arenas of this size.  
528 Occasional human error in counting, or immobile animals, or animals with repeated collisions were  
529 encountered, so the exact number of tracks analyzed was not always known, but we estimate that  
530 the number of animals in each experiment was always between 18 and 22. The behavior of any  
531 moving larva was included in every analysis of every experiment.

### 532 **Drosophila handling**

533 Canton-S wild type adult flies were kept in cages (Genesee Scientific) with 6 cm Petri dishes with  
534 grape juice and yeast food, with new plates exchanged every 24 hr. Animals were collected from  
535 the plates, selecting second instar larvae by age (24 – 72 hr AEL) and spiracle development of each  
536 individual. The typical larva size at this instar is 1 – 2 mm in length. For each experiment, between  
537 20 and 25 larvae were rinsed in distilled water, allowed to crawl on agar gel (3 percent wt./vol) for  
538 5 min, then placed on a separate dark agar gel atop the aluminum plate of the electromechanical  
539 transducer. The mutant strains were treated the same way.

540 All animals for the experiment are placed on the agar surface together, near the center, with  
541 approximately 1 cm separating each animal. Given the small fraction of the available space taken  
542 up by the animals, collisions were infrequent. Importantly, when a collision does occur, the event is  
543 not flagged as a turn for the purposes of avoidance behavior computation, so if the collision rate  
544 decreases over time as animals spread out, the extracted information is unaffected.

### 545 **Acknowledgments**

546 The authors thank James Baker and Kevin Collins for comments on the manuscript.

### 547 **References**

- 548 **Acevedo SF**, Froudarakis EI, Kanellopoulos A, Skoulakis EMC. Protection from premature habituation requires  
549 functional mushroom bodies in *Drosophila*. *Learn Mem.* 2007 may; 14(5):376–384. <https://www.ncbi.nlm.nih.gov/pmc/articles/PMC1876762/>, doi: 10.1101/lm.566007.
- 551 **Akala DBG**, Wilson CF, Zong L, Tanaka NK, Ito K, Davis RL. Roles for *Drosophila* mushroom body neurons in  
552 olfactory learning and memory. *Learn Mem.* 2006 sep; 13(5):659–668. <http://learnmem.cshlp.org/content/13/5/659>, doi: 10.1101/lm.221206.
- 554 **Almeida-Carvalho MJ**, Berh D, Braun A, Chen YC, Eichler K, Eschbach C, Fritsch PMJ, Gerber B, Hoyer N, Jiang X,  
555 Kleber J, Klämbt C, König C, Louis M, Michels B, Miroshnikow A, Mirth C, Miura D, Niewalda T, Otto N, et al.

- 556 The OI1mpiad: concordance of behavioural faculties of stage 1 and stage 3 *Drosophila* larvae. *J Exp Biol.* 2017;  
557 220(Pt 13):2452–2475. doi: [10.1242/jeb.156646](https://doi.org/10.1242/jeb.156646).
- 558 **Applewhite PB.** Retention of Habituation in a Protozoan improved by Low Temperature. *Nature.* 1968 sep;  
559 219(5160):1265–1266. <https://www.nature.com/articles/2191265b0>, doi: 10.1038/2191265b0.
- 560 **Belzung C, Griebel G.** Measuring normal and pathological anxiety-like behaviour in mice: a review. *Be-*  
561 *havioural Brain Research.* 2001 nov; 125(1):141–149. [http://www.sciencedirect.com/science/article/pii/](http://www.sciencedirect.com/science/article/pii/S0166432801002911)  
562 [S0166432801002911](http://www.sciencedirect.com/science/article/pii/S0166432801002911), doi: 10.1016/S0166-4328(01)00291-1.
- 563 **Berni J, Pulver SR, Griffith LC, Bate M.** Autonomous Circuitry for Substrate Exploration in Freely Moving  
564 *Drosophila* Larvae. *Current Biology.* 2012 oct; 22(20):1861–1870. [http://www.sciencedirect.com/science/](http://www.sciencedirect.com/science/article/pii/S0960982212008731)  
565 [article/pii/S0960982212008731](http://www.sciencedirect.com/science/article/pii/S0960982212008731), doi: 10.1016/j.cub.2012.07.048.
- 566 **Bozorgmehr T, Ardiel EL, McEwan AH, Rankin CH.** Mechanisms of plasticity in a *Caenorhabditis elegans*  
567 mechanosensory circuit. *Front Physiol.* 2013 Aug; 4(88):1–11.
- 568 **Brea J, Urbanczik R, Senn W.** A Normative Theory of Forgetting: Lessons from the Fruit Fly. *PLOS Computational*  
569 *Biology.* 2014 jun; 10(6):e1003640. [http://journals.plos.org/ploscompbiol/article?id=10.1371/journal.pcbi.](http://journals.plos.org/ploscompbiol/article?id=10.1371/journal.pcbi.1003640)  
570 [1003640](http://journals.plos.org/ploscompbiol/article?id=10.1371/journal.pcbi.1003640), doi: 10.1371/journal.pcbi.1003640.
- 571 **Burrows M, Laurent G.** Synaptic potentials in the central terminals of locust proprioceptive afferents generated  
572 by other afferents from the same sense organ. *J Neurosci.* 1993 Feb; 13(2):806–819.
- 573 **Burtally N, King PJ, Swift MR.** Spontaneous air-driven separation in vertically vibrated fine granular mixtures.  
574 *Science.* 2002 Mar; 295(5561):1877–1879.
- 575 **Byers D, Davis RL, Kiger Jr JA.** Defect in cyclic AMP phosphodiesterase due to the dunce mutation of learning in  
576 *Drosophila melanogaster*. *Nature.* 1981 jan; 289(5793):79–81. <https://www.nature.com/articles/289079a0>,  
577 doi: 10.1038/289079a0.
- 578 **Cattaert D, el Manira A, Clarac F.** Direct evidence for presynaptic inhibitory mechanisms in crayfish sensory  
579 afferents. *J Neurophysiol.* 1992 Mar; 67(3):610–624.
- 580 **Cheng LE, Song W, Looger LL, Jan LY, Jan YN.** The Role of the TRP Channel NompC in *Drosophila* Larval and  
581 Adult Locomotion. *Neuron.* 2010 aug; 67(3):373–380. [http://www.sciencedirect.com/science/article/pii/](http://www.sciencedirect.com/science/article/pii/S0896627310005428)  
582 [S0896627310005428](http://www.sciencedirect.com/science/article/pii/S0896627310005428), doi: 10.1016/j.neuron.2010.07.004.
- 583 **Cho W, Heberlein U, Wolf FW.** Habituation of an odorant-induced startle response in *Drosophila*. *Genes, Brain*  
584 *and Behavior.* 2004; 3(3):127–137. <https://onlinelibrary.wiley.com/doi/abs/10.1111/j.1601-183x.2004.00061.x>,  
585 doi: 10.1111/j.1601-183x.2004.00061.x.
- 586 **Clark MQ, Zarin AA, Carreira-Rosario A, Doe CQ.** Neural circuits driving larval locomotion in *Drosophila*. *Neural*  
587 *Dev.* 2018; 13(6).
- 588 **Colomb J, Grillenzoni N, Stocker RF, Ramaekers A.** Complex behavioural changes after odour exposure in  
589 *Drosophila* larvae. *Animal Behaviour.* 2007 apr; 73(4):587–594. [http://www.sciencedirect.com/science/article/](http://www.sciencedirect.com/science/article/pii/S0003347207000085)  
590 [pii/S0003347207000085](http://www.sciencedirect.com/science/article/pii/S0003347207000085), doi: 10.1016/j.anbehav.2006.04.016.
- 591 **Conti M, Richter W, Mehats C, Livera G, Park JY, Jin C.** Cyclic AMP-specific PDE 4 Phosphodiesterases as Critical  
592 Components of Cyclic AMP Signaling. *J Biol Chem.* 2003 feb; 278(8):5493–5496. [http://www.jbc.org/content/](http://www.jbc.org/content/278/8/5493)  
593 [278/8/5493](http://www.jbc.org/content/278/8/5493), doi: 10.1074/jbc.R200029200.
- 594 **Crawley JN.** Exploratory Behavior Models of Anxiety in Mice. *Neuroscience & Biobehavioral Reviews.* 1985;  
595 9(1):37–44. doi: [https://doi.org/10.1016/0149-7634\(85\)90030-2](https://doi.org/10.1016/0149-7634(85)90030-2).
- 596 **Das S, Sadanandappa MK, Dervan A, Larkin A, Lee JA, Sudhakaran IP, Priya R, Heidari R, Holohan EE, Pimentel A,**  
597 **Gandhi A, Ito K, Sanyal S, Wang JW, Rodrigues V, Ramaswami M.** Plasticity of local GABAergic interneurons  
598 drives olfactory habituation. *PNAS.* 2011 sep; 108(36):E646—E654. [http://www.pnas.org/content/108/36/](http://www.pnas.org/content/108/36/E646)  
599 [E646](http://www.pnas.org/content/108/36/E646), doi: 10.1073/pnas.1106411108.
- 600 **Davis RL.** Mushroom bodies and *drosophila* learning. *Neuron.* 1993 jul; 11(1):1–14. [http://www.sciencedirect.](http://www.sciencedirect.com/science/article/pii/S089662739390266T)  
601 [com/science/article/pii/S089662739390266T](http://www.sciencedirect.com/science/article/pii/S089662739390266T), doi: 10.1016/0896-6273(93)90266-T.
- 602 **Denny MR.** Post-aversive relief and relaxation and their implications for behavior therapy. *J Behav Ther & Exp*  
603 *Psychiat.* 1976; 7:315–321.

- 604 **Dubnau J**, Grady L, Kitamoto T, Tully T. Disruption of neurotransmission in *Drosophila* mushroom body blocks  
605 retrieval but not acquisition of memory. *Nature*. 2001 may; 411(6836):476–480. [https://www.nature.com/](https://www.nature.com/articles/35078077)  
606 [articles/35078077](https://www.nature.com/articles/35078077), doi: 10.1038/35078077.
- 607 **Dudai Y**. Neurogenetic Dissection of Learning and Short-Term Memory in *Drosophila*. *Annual Review of*  
608 *Neuroscience*. 1988; 11(1):537–563. <https://doi.org/10.1146/annurev.ne.11.030188.002541>, doi: 10.1146/an-  
609 [nurev.ne.11.030188.002541](https://doi.org/10.1146/annurev.ne.11.030188.002541).
- 610 **Duerr JS**, Quinn WJ. Three *Drosophila* mutations that block associative learning also affect habituation and  
611 sensitization. *PNAS*. 1982; 79(11):3646–50. <http://www.pnas.org/content/79/11/3646.short>.
- 612 **Edison M**, Belay AT, Sokolowski MB, Heberlein U. A Genetic Screen for Olfactory Habituation Mutations  
613 in *Drosophila*: Analysis of Novel Foraging Alleles and an Underlying Neural Circuit. *PLOS ONE*. 2012 dec;  
614 7(12):e51684. <http://journals.plos.org/plosone/article?id=10.1371/journal.pone.0051684>, doi: 10.1371/jour-  
615 [nal.pone.0051684](http://journals.plos.org/plosone/article?id=10.1371/journal.pone.0051684).
- 616 **Engel JE**, Wu CF. Neurogenetic approaches to habituation and dishabituation in *Drosophila*. *Neurobiol-*  
617 *ogy of Learning and Memory*. 2009 sep; 92(2):166–175. [http://www.sciencedirect.com/science/article/pii/](http://www.sciencedirect.com/science/article/pii/S1074742708001470)  
618 [S1074742708001470](http://www.sciencedirect.com/science/article/pii/S1074742708001470), doi: 10.1016/j.nlm.2008.08.003.
- 619 **Fersht AR**, Leatherbarrow RJ, Wells TNC. Binding energy and catalysis: a lesson from protein engineering of the  
620 tyrosyl-tRNA synthetase. *Trends in Biochemical Sciences*. 1986 aug; 11(8):321–325. [http://www.sciencedirect.](http://www.sciencedirect.com/science/article/pii/0968000486902896)  
621 [com/science/article/pii/0968000486902896](http://www.sciencedirect.com/science/article/pii/0968000486902896), doi: 10.1016/0968-0004(86)90289-6.
- 622 **Fowler MA**, Montell C. *Drosophila* TRP channels and animal behavior. *Life Sciences*. 2013 mar; 92(8):394–403.  
623 <http://www.sciencedirect.com/science/article/pii/S0024320512003918>, doi: 10.1016/j.lfs.2012.07.029.
- 624 **Fushiki A**, Zwart MF, Kohsaka H, Fetter RD, Cardona A, Nose A. A circuit mechanism for the propagation of waves  
625 of muscle contraction in *Drosophila*. *eLife*. 2016; 5. <https://www.ncbi.nlm.nih.gov/pmc/articles/PMC4829418/>,  
626 doi: 10.7554/eLife.13253.
- 627 **Gerber B**, Stocker RF. The *Drosophila* larva as a model for studying chemosensation and chemosensory learning:  
628 a review. *Chem Senses*. 2007 Jan; 32(1):65–89.
- 629 **Gershow M**, Berck M, Mathew D, Luo L, Kane EA, Carlson JR, Samuel ADT. Controlling airborne cues to study  
630 small animal navigation. *Nature Methods*. 2012 Jan; 9(3):290–296.
- 631 **Geyer MA**, Braff DL. Startle Habituation and Sensorimotor Gating in Schizophrenia and Related Animal Models.  
632 *Schizophrenia Bulletin*. 1987; 13(4):643–668. doi: 10.1093/schbul/13.4.643.
- 633 **van Giesen L**, Hernandez-Nunez L, Delasoie-Baranek S, Colomobo M, Renaud P, Bruggmann R, Benton R,  
634 Samuel ADT, Sprecher SG. Multimodal stimulus coding by a gustatory sensory neuron in *Drosophila* larvae.  
635 *Nature Communications*. 2016 Feb; 7:10687.
- 636 **Gjorgjieva J**, Berni J, Evers JF, Eglen S. Neural circuits for peristaltic wave propagation in crawling *Drosophila*  
637 larvae: analysis and modeling. *Front Comput Neurosci*. 2013; 7. [https://www.frontiersin.org/articles/10.3389/](https://www.frontiersin.org/articles/10.3389/fncom.2013.00024/full)  
638 [fncom.2013.00024/full](https://www.frontiersin.org/articles/10.3389/fncom.2013.00024/full), doi: 10.3389/fncom.2013.00024.
- 639 **Grueber WB**, Jan LY, Jan YN. Tiling of the *Drosophila* epidermis by multidendritic sensory neurons. *Development*.  
640 2002 jun; 129(12):2867–2878. <http://dev.biologists.org/content/129/12/2867>.
- 641 **Grueber WB**, Ye B, Yang CH, Younger S, Borden K, Jan LY, Jan YN. Projections of *Drosophila* multidendritic  
642 neurons in the central nervous system: links with peripheral dendrite morphology. *Development*. 2007 jan;  
643 134(1):55–64. <http://dev.biologists.org/content/134/1/55>, doi: 10.1242/dev.02666.
- 644 **Han KA**, Millar NS, Grotewiel MS, Davis RL. DAMB, a Novel Dopamine Receptor Expressed Specifically in  
645 *Drosophila* Mushroom Bodies. *Neuron*. 1996 jun; 16(6):1127–1135. [http://www.sciencedirect.com/science/](http://www.sciencedirect.com/science/article/pii/S0896627300801397)  
646 [article/pii/S0896627300801397](http://www.sciencedirect.com/science/article/pii/S0896627300801397), doi: 10.1016/S0896-6273(00)80139-7.
- 647 **Heiman RG**, Atkinson RC, Andruss BF, Bolduc C, Kovalick GE, Beckingham K. Spontaneous avoidance behavior in  
648 *Drosophila* null for calmodulin expression. *PNAS*. 1996 mar; 93(6):2420–2425. [http://www.pnas.org/content/](http://www.pnas.org/content/93/6/2420)  
649 [93/6/2420](http://www.pnas.org/content/93/6/2420), doi: 10.1073/pnas.93.6.2420.
- 650 **Hollis K**, Guillette L. Associative learning in insects : evolutionary models, mushroom bodies, and a neuroscien-  
651 tific conundrum. *St Andrews Research Repository*. 2011; 6:24–45. [https://research-repository.st-andrews.ac.](https://research-repository.st-andrews.ac.uk/handle/10023/3568)  
652 [uk/handle/10023/3568](https://research-repository.st-andrews.ac.uk/handle/10023/3568).

- 653 **Hoyer N**, Petersen M, Tenedini F, Soba P. Assaying Mechanonociceptive Behavior in Drosophila Larvae. *BIO-*  
654 *PROTOCOL*. 2018; 8(4). <http://www.bio-protocol.org/e2736>, doi: 10.21769/BioProtoc.2736.
- 655 **Hughes CL**, Thomas JB. A sensory feedback circuit coordinates muscle activity in Drosophila. *Mol Cell Neurosci*.  
656 2007 Jun; 35(2):383–396.
- 657 **Hwang RY**, Zhong L, Xu Y, Johnson T, Zhang F, Deisseroth K, Tracey WD. Nociceptive Neurons Protect Drosophila  
658 Larvae from Parasitoid Wasps. *Current Biology*. 2007 dec; 17(24):2105–2116. <http://www.sciencedirect.com/science/article/pii/S0960982207022683>, doi: 10.1016/j.cub.2007.11.029.
- 660 **Jäger J**, Henn V. Habituation of the vestibulo-ocular reflex (VOR) in the monkey during sinusoidal rotation in  
661 the dark. *Exp Brain Res*. 1981 jan; 41(2):108–114. <https://link.springer.com/article/10.1007/BF00236599>, doi:  
662 10.1007/BF00236599.
- 663 **Kane EA**, Gershow M, Afonso B, Larderet I, Klein M, Carter AR, de Bivort BL, Sprecher SG, Samuel AD. Sensori-  
664 motor structure of Drosophila larva phototaxis. *Proc Natl Acad Sci USA*. 2013 Oct; 110(40):E3868–77.
- 665 **Karkali K**, Martin-Blanco E. Mechanosensing in the Drosophila nervous system. *Semin Cell Dev Biol*. 2017 Nov;  
666 71:22–29.
- 667 **Kernan M**, Cowan D, Zuker C. Genetic dissection of mechanosensory transduction: mechanoreception-defective  
668 mutations of Drosophila. *Neuron*. 1994 Jun; 12(6):1195–1206.
- 669 **Khurana S**, Abubaker MB, Siddiqi O. Odour avoidance learning in the larva of Drosophila melanogaster. *J Biosci*.  
670 2009 oct; 34(4):621. <https://link.springer.com/article/10.1007/s12038-009-0080-9>, doi: 10.1007/s12038-009-  
671 0080-9.
- 672 **Khurana S**, Siddiqi O. Olfactory Responses of Drosophila Larvae. *Chem Senses*. 2013 may; 38(4):315–323.  
673 <https://academic.oup.com/chemse/article/38/4/315/317623>, doi: 10.1093/chemse/bjs144.
- 674 **Kim SE**, Coste B, Chadha A, Cook B, Patapoutian A. The role of Drosophila Piezo in mechanical nociception. *Nat-*  
675 *ure*. 2012 mar; 483(7388):209–212. <https://www.nature.com/articles/nature10801>, doi: 10.1038/nature10801.
- 676 **King SC**, Wilson TH. Characterization of Escherichia coli lactose carrier mutants that transport protons without a  
677 cosubstrate. Probes for the energy barrier to uncoupled transport. *J Biol Chem*. 1990 jun; 265(17):9645–9651.  
678 <http://www.jbc.org/content/265/17/9645>.
- 679 **Klein M**, Tsai LL, Rosen MS, Pavlin T, Candela D, Walsworth RL. Interstitial gas and density segregation of  
680 vertically vibrated granular media. *Phys Rev E*. 2006 Jul; 74:010301(R).
- 681 **Klein M**, Afonso B, Vonner AJ, Hernandez-Nunez L, Berck M, Tabone CJ, Kane EA, Pieribone VA, Nitabach MN,  
682 Cardona A, Zlatic M, Sprecher SG, Gershow M, Garrity PA, Samuel ADT. Sensory determinants of behavioral  
683 dynamics in Drosophila thermotaxis. *PNAS*. 2015 Jan; 112(2):E220–E229.
- 684 **Klein M**, Krivov SV, Ferrer AJ, Luo L, Samuel ADT, Karplus M. Exploratory search during directed navigation in *C.*  
685 *elegans* and Drosophila larva. *eLife*. 2017; 6. <https://www.ncbi.nlm.nih.gov/pmc/articles/PMC5662291/>, doi:  
686 10.7554/eLife.30503.
- 687 **Koopmans LH**. The Spectral Analysis of Time Series. Academic Press; 1995.
- 688 **Kurusu M**, T A, Masuda-Nakagawa L, Kawauchi H, Ito K, Furukubo-Tokunaga K. Embryonic and larval devel-  
689 opment of the {Drosophila} mushroom bodies: concentric layer subdivisions and the role of fasciclin {II}  
690 {\textbar} {Development}. *Development*. 2002; 129(2):409–419. [http://dev.biologists.org/content/129/2/409.](http://dev.biologists.org/content/129/2/409.short)  
691 [short](http://dev.biologists.org/content/129/2/409.short).
- 692 **Lahiri S**, Shen K, Klein M, Tang A, Kane E, Gershow M, Garrity P, Samuel ADT. Two alternating motor programs  
693 drive navigation in Drosophila larva. *PLOS ONE*. 2011 Aug; 6(8):e23180.
- 694 **Larkin A**, Karak S, Priya R, Das A, Ayyub C, Ito K, Rodrigues V, Ramaswami M. Central synaptic mechanisms  
695 underlie short-term olfactory habituation in Drosophila larvae. *Learn Mem*. 2010 dec; 17(12):645–653.  
696 <http://learnmem.cshlp.org/content/17/12/645>, doi: 10.1101/lm.1839010.
- 697 **Lee D**. Global and local missions of cAMP signaling in neural plasticity, learning, and memory. *Front Pharmacol*.  
698 2015; 6. <https://www.frontiersin.org/articles/10.3389/fphar.2015.00161/full>, doi: 10.3389/fphar.2015.00161.
- 699 **Levin LR**, Han PL, Hwang PM, Feinstein PG, Davis RL, Reed RR. The Drosophila learning and memory gene  
700 rutabaga encodes a Ca<sup>2+</sup> calmodulin-responsive adenyl cyclase. *Cell*. 1992 feb; 68(3):479–489. <http://www.sciencedirect.com/science/article/pii/009286749290185F>, doi: 10.1016/0092-8674(92)90185-F.

- 702 **Luo L**, Gershow M, Rosenzweig M, Kang KJ, Fang-Yen C, Garrity PA, Samuel ADT. Navigational decision making in  
703 *Drosophila thermotaxis*. *J Neurosci*. 2010 Mar; 30(12):4261–4272.
- 704 **Madhumala K Sadanandappa, Beatriz Blanco Redondo, Birgit Michels, Veronica Rodrigues, Bertram**  
705 **Gerber, K VijayRaghavan EB**, Ramaswami M. Synapsin Function in GABA-ergic Interneurons Is Required for  
706 Short-Term Olfactory Habituation *Journal of Neuroscience*. The Journal Of Neuroscience. 2013; 33(42):16576–  
707 16585. <http://www.jneurosci.org/content/33/42/16576.short>, doi: <https://doi.org/10.1523/JNEUROSCI.3142-13.2013>.  
708
- 709 **Neckameyer WS**. Dopamine and Mushroom Bodies in *Drosophila*: Experience-Dependent and -Independent  
710 Aspects of Sexual Behavior. *Learn Mem*. 1998 may; 5(1):157–165. <http://learnmem.cshlp.org/content/5/1/157>,  
711 doi: [10.1101/lm.5.1.157](https://doi.org/10.1101/lm.5.1.157).
- 712 **Neuser K**, Husse J, Stock P, Gerber B. Appetitive olfactory learning in *Drosophila* larvae: effects of repetition,  
713 reward strength, age, gender, assay type and memory span. *Animal Behaviour*. 2005 apr; 69(4):891–898.  
714 <http://www.sciencedirect.com/science/article/pii/S0003347204003999>, doi: [10.1016/j.anbehav.2004.06.013](https://doi.org/10.1016/j.anbehav.2004.06.013).
- 715 **Nighorn A**, Healy MJ, Davis RL. The cyclic AMP phosphodiesterase encoded by the *drosophila dunce* gene is  
716 concentrated in the mushroom body neuropil. *Neuron*. 1991; 6(3):455–467. <https://www.sciencedirect.com/science/article/pii/089662739190253V>, doi: [https://doi.org/10.1016/0896-6273\(91\)90253-V](https://doi.org/10.1016/0896-6273(91)90253-V).  
717
- 718 **Ohyama T**, Jovanic T, Denisov G, Dang TC, Hoffmann D, Kerr RA, Zlatić M. High-Throughput Analy-  
719 sis of Stimulus-Evoked Behaviors in *Drosophila* Larva Reveals Multiple Modality-Specific Escape Strate-  
720 gies. *PLOS ONE*. 2013; <http://journals.plos.org/plosone/article?id=10.1371/journal.pone.0071706>, doi:  
721 <https://doi.org/10.1371/journal.pone.0071706>.
- 722 **Ohyama T**, Schneider-Mizell CM, Fetter RD, Aleman JV, Franconville R, Rivera-Alba M, Mensh BD, Branson KM,  
723 Simpson JH, Truman JW, Cardona A, Zlatić M. A multilevel multimodal circuit enhances action selection  
724 in *Drosophila*. *Nature*. 2015 apr; 520(7549):633–639. <https://www.nature.com/articles/nature14297>, doi:  
725 [10.1038/nature14297](https://doi.org/10.1038/nature14297).
- 726 **Panek I**, French AS, Seyfarth EA, ichi Sekizawa S, Torkkeli PH. Peripheral GABAergic inhibition of spider  
727 mechanosensory afferents. *Eur J Neurosci*. 2002 Jul; 16(1):96–104.
- 728 **Paranjpe P**, Rodrigues V, VijayRaghavan K, Ramaswami M. Gustatory habituation in *Drosophila* relies on  
729 rutabaga (adenylate cyclase)-dependent plasticity of GABAergic inhibitory neurons. *Learn Mem*. 2012 dec;  
730 19(12):627–635. <http://learnmem.cshlp.org/content/19/12/627>, doi: [10.1101/lm.026641.112](https://doi.org/10.1101/lm.026641.112).
- 731 **Pulver SR**, Hornstein NJ, Land BL, Johnson BR. Optogenetics in the teaching laboratory: using channelrhodopsin-  
732 2 to study the neural basis of behavior and synaptic physiology in *Drosophila*. *Advances in Physiology*  
733 *Education*. 2011 mar; 35(1):82–91. <https://www.physiology.org/doi/abs/10.1152/advan.00125.2010>, doi:  
734 [10.1152/advan.00125.2010](https://doi.org/10.1152/advan.00125.2010).
- 735 **Quinn WG**, Harris WA, Benzer S. Conditioned Behavior in *Drosophila melanogaster*. *PNAS*. 1974 mar; 71(3):708–  
736 712. <http://www.pnas.org/content/71/3/708>, doi: [10.1073/pnas.71.3.708](https://doi.org/10.1073/pnas.71.3.708).
- 737 **Rees CT**, of Spatz HC. Habituation of the Landing Response of *Drosophila* Wild-Type and Mutants Defec-  
738 tive in Olfactory Learning. *Journal of Neurogenetics*. 1989 jan; 5(2):105–118. <https://doi.org/10.3109/01677068909066201>, doi: [10.3109/01677068909066201](https://doi.org/10.3109/01677068909066201).
- 740 **Riedl J**, Louis M. Behavioral Neuroscience: Crawling Is a No-Brainer for Fruit Fly Larvae. *Current Biology*.  
741 2012 Oct; 22(20):R867–R869. <http://www.sciencedirect.com/science/article/pii/S0960982212009463>, doi:  
742 [10.1016/j.cub.2012.08.018](https://doi.org/10.1016/j.cub.2012.08.018).
- 743 **Rose JK**, Rankin CH. Analyses of Habituation in *Caenorhabditis elegans*. *Learn Mem*. 2001 mar; 8(2):63–69.  
744 <http://learnmem.cshlp.org/content/8/2/63>, doi: [10.1101/lm.37801](https://doi.org/10.1101/lm.37801).
- 745 **Rosen SC**, Weiss KR, Kupfermann I. Response properties and synaptic connections of mechanoaffluent neurons  
746 in cerebral ganglion of *Aplysia*. *J Neurophysiol*. 1979; 42(4):954.
- 747 **Rosenzweig M**, Kang K, Garrity PA. Distinct TRP channels are required for warm and cool avoidance in *Drosophila*  
748 *melanogaster*. *PNAS*. 2008 sep; 105(38):14668–14673. <http://www.pnas.org/content/105/38/14668>, doi:  
749 [10.1073/pnas.0805041105](https://doi.org/10.1073/pnas.0805041105).
- 750 **Sasaki A**, Wetsel WC, Rodriguiz RM, meck@psych.duke.edu Meck WH. Timing of the Acoustic Startle Response  
751 in Mice: Habituation and Dishabituation as a Function of the Interstimulus Interval. *International Journal of*  
752 *Comparative Psychology*. 2001 jan; 14(3). <https://escholarship.org/uc/item/97q435qw>.

- 753 **Stopfer M**, Carew TJ. Heterosynaptic facilitation of tail sensory neuron synaptic transmission during habituation  
754 in tail-induced tail and siphon withdrawal reflexes of Aplysia. *J Neurosci*. 1996; 16:4933.
- 755 **Su CY**, Martelli C, Emonet T, Carlson JR. Temporal coding of odor mixtures in an olfactory receptor neuron. *PNAS*.  
756 2011 mar; 108(12):5075–5080. <http://www.pnas.org/content/108/12/5075>, doi: 10.1073/pnas.1100369108.
- 757 **van Swinderen B**. Attention-Like Processes in *Drosophila* Require Short-Term Memory Genes. *Science*.  
758 2007 mar; 315(5818):1590–1593. <http://science.sciencemag.org/content/315/5818/1590>, doi: 10.1126/sci-  
759 [ence.1137931](http://science.sciencemag.org/content/315/5818/1590).
- 760 **Titlow JS**, Rice J, Majeed ZR, Holsopple E, Biecker S, Cooper RL. Anatomical and genotype-specific mechanosen-  
761 sory responses in *Drosophila melanogaster* larvae. *Neuroscience Research*. 2014 jun; 83:54–63. [http://](http://www.sciencedirect.com/science/article/pii/S016810214000686)  
762 [www.sciencedirect.com/science/article/pii/S016810214000686](http://www.sciencedirect.com/science/article/pii/S016810214000686), doi: 10.1016/j.neures.2014.04.003.
- 763 **Tully T**, Boynton S, Brandes C, Dura J, Mihalek R, Preat T, Vilella A. Genetic Dissection of Memory Formation in  
764 *Drosophila melanogaster*. *CSH Symposia*. 1990; 55:203–211. <http://symposium.cshlp.org/content/55/203>.  
765 [short](http://symposium.cshlp.org/content/55/203).
- 766 **Tully T**, Preat T, Boynton SC, Del Vecchio M. Genetic dissection of consolidated memory in *Drosophila*. *Cell*. 1994  
767 oct; 79(1):35–47. <http://www.sciencedirect.com/science/article/pii/0092867494903980>, doi: 10.1016/0092-  
768 [8674\(94\)90398-0](http://www.sciencedirect.com/science/article/pii/0092867494903980).
- 769 **Tully T**, Quinn WG. Classical conditioning and retention in normal and mutant *Drosophila melanogaster*.  
770 *J Comp Physiol*. 1985 mar; 157(2):263–277. <https://link.springer.com/article/10.1007/BF01350033>, doi:  
771 [10.1007/BF01350033](https://link.springer.com/article/10.1007/BF01350033).
- 772 **Tuthill JC**, Wilson RI. Mechanosensation and Adaptive Motor Control in Insects. *Current Biology*. 2016  
773 oct; 26(20):R1022—R1038. <http://www.sciencedirect.com/science/article/pii/S0960982216307448>, doi:  
774 [10.1016/j.cub.2016.06.070](http://www.sciencedirect.com/science/article/pii/S0960982216307448).
- 775 **Twick I**, Lee JA, Ramaswami M. Olfactory Habituation in *Drosophila*—Odor Encoding and its Plasticity in the  
776 Antennal Lobe. In: Barkai E, Wilson DA, editors. *Progress in Brain Research*, vol. 208 of Odor {Memory} and  
777 {Perception} Elsevier; 2014.p. 3–38. <http://www.sciencedirect.com/science/article/pii/B9780444633507000012>,  
778 doi: 10.1016/B978-0-444-63350-7.00001-2.
- 779 **Waltreit R**, Weller M. Signaling from cAMP/PKA to MAPK and synaptic plasticity. *Mol Neurobiol*. 2003 feb;  
780 27(1):99–106. <https://link.springer.com/article/10.1385/MN:27:1:99>, doi: 10.1385/MN:27:1:99.
- 781 **Xiang Y**, Yuan Q, Vogt N, Looger LL, Jan LY, Jan YN. Light-avoidance-mediating photoreceptors tile the *Drosophila*  
782 larval body wall. *Nature*. 2010 dec; 468(7326):921–926. <https://www.nature.com/articles/nature09576>, doi:  
783 [10.1038/nature09576](https://www.nature.com/articles/nature09576).
- 784 **Zhang W**, Sobolevski A, Li B, Rao Y, Liu X. An automated force-controlled robotic micromanipulation system for  
785 mechanotransduction studies of *Drosophila* larvae. *IEEE T Autom Sci Eng*. 2016 Apr; 13(2):789–797.
- 786 **Zhang W**, Yan Z, Jan LY, Jan YN. Sound response mediated by the TRP channels NOMPC, NANCHUNG, and  
787 INACTIVE in chordotonal organs of *Drosophila* larvae. *PNAS*. 2013 aug; 110(33):13612–13617. [http://www.](http://www.pnas.org/content/110/33/13612)  
788 [pnas.org/content/110/33/13612](http://www.pnas.org/content/110/33/13612), doi: 10.1073/pnas.1312477110.
- 789 **Zhong L**, Hwang RY, Tracey WD. Pickpocket Is a DEG/ENaC Protein Required for Mechanical Nociception in  
790 *Drosophila* Larvae. *Current Biology*. 2010 mar; 20(5):429–434. [http://www.sciencedirect.com/science/article/](http://www.sciencedirect.com/science/article/pii/S0960982210000539)  
791 [pii/S0960982210000539](http://www.sciencedirect.com/science/article/pii/S0960982210000539), doi: 10.1016/j.cub.2009.12.057.
- 792 **Zhong Y**, Budnik V, Wu CF. Synaptic plasticity in *Drosophila* memory and hyperexcitable mutants: role  
793 of cAMP cascade. *J Neurosci*. 1992 feb; 12(2):644–651. <http://www.jneurosci.org/content/12/2/644>, doi:  
794 [10.1523/JNEUROSCI.12-02-00644.1992](http://www.jneurosci.org/content/12/2/644).
- 795 **Zhong Y**, Wu CF. Altered synaptic plasticity in *Drosophila* memory mutants with a defective cyclic AMP cas-  
796 cade. *Science*. 1991 jan; 251(4990):198–201. <http://science.sciencemag.org/content/251/4990/198>, doi:  
797 [10.1126/science.1670967](http://science.sciencemag.org/content/251/4990/198).
- 798 **Zucker RS**. Crayfish escape behavior and central synapses. II. Physiological mechanisms underlying behavioral  
799 habituation. *Journal of Neurophysiology*. 1972 sep; 35(5):621–637. [http://www.physiology.org/doi/10.1152/jn.](http://www.physiology.org/doi/10.1152/jn.1972.35.5.621)  
800 [1972.35.5.621](http://www.physiology.org/doi/10.1152/jn.1972.35.5.621), doi: 10.1152/jn.1972.35.5.621.
